# Supplementary material for: Comprehensive analysis of miRNA-mRNA/lncRNA during gonadal development of triploid female rainbow trout (Oncorhynchus mykiss)
Source: Research Square preprint supplement (doi:10.21203/rs.3.rs-31357/v2), 2020-12-10
Supplement: Supplementary file 1 [file 16ec5ec19d739185f635a301.XLSX]

## Sheet: Sheet1
Gene	FC	qVal	Sig
XR_002474691.1	9.83089	7.97063e-14	yes
XM_021585538.1	inf	3.70871e-13	yes
XM_021558960.1	inf	7.80971e-13	yes
XM_021557980.1	inf	2.08926e-11	yes
XM_021570618.1	inf	5.43069e-11	yes
XR_002468383.1	-inf	1.35066e-10	yes
XM_021624223.1	-inf	4.70327e-10	yes
XM_021556871.1	inf	1.04942e-09	yes
XM_021562461.1	inf	2.51658e-09	yes
XM_021569341.1	-inf	1.25947e-08	yes
XM_021579796.1	inf	1.29297e-08	yes
XM_021568864.1	-8.03333	3.1483e-08	yes
XM_021587682.1	11.74	3.9616e-08	yes
XM_021573609.1	inf	5.07434e-08	yes
XM_021589300.1	inf	6.47013e-08	yes
XM_021590534.1	-inf	7.5747e-08	yes
XM_021582760.1	-inf	8.26345e-08	yes
XR_002470260.1	inf	9.5198e-08	yes
XM_021624220.1	-inf	1.22683e-07	yes
XM_021582750.1	-inf	1.45844e-07	yes
XR_002473520.1	-inf	2.10396e-07	yes
XM_021565826.1	inf	2.83288e-07	yes
XM_021597518.1	inf	5.02605e-07	yes
XM_021600019.1	inf	5.3084e-07	yes
XM_021557110.1	-inf	7.43228e-07	yes
XM_021571249.1	-inf	7.81125e-07	yes
XM_021569211.1	14.104	9.13459e-07	yes
XM_021561905.1	inf	1.28992e-06	yes
XM_021600754.1	-inf	1.30237e-06	yes
XM_021606137.1	-inf	1.72837e-06	yes
XM_021616164.1	8.12365	1.83333e-06	yes
XM_021581033.1	inf	2.83533e-06	yes
XM_021591464.1	inf	3.16729e-06	yes
XM_021561321.1	-inf	3.16729e-06	yes
XR_002473399.1	inf	3.30976e-06	yes
XM_021605328.1	inf	3.52539e-06	yes
XM_021579519.1	-inf	3.96749e-06	yes
XR_002475066.1	7.78026	4.05277e-06	yes
XM_021625373.1	inf	4.06277e-06	yes
XM_021618425.1	-inf	4.29606e-06	yes
XM_021598284.1	-inf	4.55927e-06	yes
XM_021606787.1	-5.40166	4.57074e-06	yes
XM_021601818.1	inf	5.49972e-06	yes
XM_021568358.1	inf	7.05965e-06	yes
XM_021584426.1	inf	8.0144e-06	yes
XM_021560852.1	-inf	1.06814e-05	yes
XM_021588733.1	inf	1.15904e-05	yes
XM_021569439.1	inf	1.38877e-05	yes
XM_021580112.1	inf	1.38877e-05	yes
XM_021565480.1	inf	1.45751e-05	yes
XM_021611612.1	-inf	2.23755e-05	yes
XM_021603836.1	inf	2.76231e-05	yes
XM_021559922.1	-inf	2.80089e-05	yes
XM_021576548.1	inf	3.74768e-05	yes
XM_021561320.1	-8.53356	4.52151e-05	yes
XM_021561425.1	-inf	4.52151e-05	yes
XM_021589575.1	-inf	5.04257e-05	yes
XM_021626066.1	inf	6.56121e-05	yes
XM_021589198.1	inf	7.12359e-05	yes
XM_021562522.1	-inf	7.3681e-05	yes
XM_021617481.1	-8.26852	8.24536e-05	yes
XM_021590610.1	8.77485	8.98364e-05	yes
XM_021602304.1	inf	0.000114447	yes
XM_021580820.1	inf	0.00011509	yes
XM_021613890.1	inf	0.000128406	yes
XM_021618554.1	4.27663	0.000147544	yes
XM_021558237.1	inf	0.000156997	yes
XM_021613008.1	-inf	0.000161594	yes
XM_021623771.1	-inf	0.000202397	yes
XM_021598574.1	-8.77756	0.000238239	yes
XM_021617669.1	-inf	0.000256313	yes
XM_021602388.1	inf	0.000256313	yes
XM_021602406.1	inf	0.000256357	yes
XM_021602379.1	inf	0.000257457	yes
XM_021592497.1	-inf	0.000257457	yes
XM_021593077.1	10.1529	0.000269383	yes
XM_021611891.1	inf	0.000288638	yes
XM_021602425.1	inf	0.00030479	yes
XM_021569105.1	4.82909	0.000305535	yes
XM_021602396.1	inf	0.000305535	yes
XM_021606635.1	inf	0.000305535	yes
XM_021589906.1	13.553	0.000311093	yes
XM_021556943.1	inf	0.000318326	yes
XM_021602430.1	inf	0.000320458	yes
XM_021590732.1	-6.34887	0.00033772	yes
XM_021560277.1	inf	0.000345756	yes
XM_021602416.1	inf	0.000375406	yes
XM_021591928.1	-10.5173	0.000375406	yes
XM_021620655.1	-5.02485	0.000396196	yes
XM_021604589.1	inf	0.000406908	yes
XM_021597169.1	-inf	0.000428474	yes
XM_021616980.1	inf	0.000447699	yes
XM_021559497.1	4.16182	0.000460837	yes
XM_021588881.1	8.56358	0.00046704	yes
XM_021570540.1	-inf	0.000468583	yes
XM_021588738.1	-7.92589	0.000525684	yes
XM_021586854.1	inf	0.000561315	yes
XM_021565692.1	-inf	0.000579243	yes
XM_021604563.1	9.14768	0.000582733	yes
XM_021601812.1	-inf	0.000598679	yes
XM_021614338.1	inf	0.000639204	yes
XM_021619449.1	-inf	0.000641441	yes
XM_021607803.1	inf	0.000671101	yes
XM_021585997.1	inf	0.000672293	yes
XM_021608895.1	-3.79237	0.000700532	yes
XM_021569570.1	-9.95249	0.000722686	yes
XM_021621877.1	-inf	0.000729157	yes
XM_021580821.1	-6.01744	0.000731237	yes
XM_021576329.1	-7.72764	0.000755656	yes
XM_021616695.1	-inf	0.00076085	yes
XM_021616977.1	inf	0.00076085	yes
XM_021625128.1	inf	0.00077723	yes
XM_021573905.1	-7.09462	0.000778033	yes
XM_021604597.1	inf	0.000778033	yes
XM_021558823.1	inf	0.000808451	yes
XM_021586419.1	-inf	0.000834245	yes
XM_021610122.1	-inf	0.000850577	yes
XM_021556948.1	6.29422	0.000948001	yes
XM_021618140.1	inf	0.000948001	yes
XM_021610044.1	-inf	0.000948001	yes
XM_021619105.1	-inf	0.000949989	yes
XM_021598048.1	-inf	0.00101195	yes
XM_021616314.1	-10.8802	0.00102678	yes
NM_001124446.1	3.55818	0.00104094	yes
XM_021575598.1	-6.46226	0.00106039	yes
XM_021588226.1	-inf	0.00111007	yes
XM_021594216.1	inf	0.00115539	yes
XM_021622228.1	inf	0.00115819	yes
XM_021565489.1	inf	0.00116415	yes
XM_021557657.1	22.0389	0.00117981	yes
XM_021603296.1	-7.52478	0.00119192	yes
XM_021610167.1	-7.48653	0.00121349	yes
XM_021565483.1	inf	0.00128624	yes
XM_021565485.1	inf	0.0013029	yes
XM_021597646.1	inf	0.00149903	yes
XM_021565799.1	-inf	0.00155444	yes
XM_021565484.1	inf	0.00155444	yes
XM_021565478.1	inf	0.00169977	yes
XM_021565476.1	inf	0.00172426	yes
XM_021610962.1	-6.86445	0.00172426	yes
XM_021596191.1	9.4752	0.00175549	yes
XM_021582327.1	-inf	0.00175983	yes
XM_021600609.1	-inf	0.00187756	yes
XM_021574423.1	-inf	0.00187756	yes
XM_021564618.1	inf	0.00188639	yes
XM_021574935.1	-inf	0.00193313	yes
XM_021601915.1	-5.32674	0.00199027	yes
XM_021565481.1	inf	0.0019938	yes
XM_021603707.1	5.84145	0.00200689	yes
XM_021556724.1	-12.8948	0.00202296	yes
XM_021616118.1	inf	0.00202296	yes
XM_021602258.1	-inf	0.00203045	yes
XM_021559717.1	inf	0.00204982	yes
XM_021603256.1	-inf	0.00206999	yes
XR_002471268.1	inf	0.0021208	yes
XM_021610666.1	-inf	0.00218803	yes
XM_021602502.1	inf	0.00218803	yes
XM_021623775.1	-inf	0.00224007	yes
XM_021610373.1	-inf	0.00224228	yes
XM_021565491.1	inf	0.00224228	yes
XM_021574775.1	-inf	0.00225108	yes
XM_021621322.1	inf	0.00228409	yes
XM_021578602.1	-inf	0.00228848	yes
XM_021577373.1	inf	0.00235763	yes
XM_021581252.1	inf	0.00235763	yes
XR_002473272.1	inf	0.00235763	yes
XM_021591665.1	5.58478	0.00241504	yes
XM_021569101.1	inf	0.00241696	yes
XM_021597629.1	-inf	0.00241904	yes
XM_021612488.1	-inf	0.00243792	yes
XM_021581156.1	inf	0.00247082	yes
XM_021573680.1	inf	0.00247936	yes
XM_021598032.1	-inf	0.00249734	yes
XM_021561692.1	inf	0.00252431	yes
XM_021610626.1	7.48573	0.00254939	yes
XM_021589031.1	inf	0.00254939	yes
XM_021596778.1	-inf	0.00256842	yes
XM_021610281.1	inf	0.00256842	yes
XM_021561866.1	inf	0.00259977	yes
XM_021595851.1	-inf	0.00259977	yes
XM_021612532.1	inf	0.00262329	yes
XM_021561422.1	-inf	0.00265412	yes
XM_021618144.1	inf	0.00267409	yes
XM_021620766.1	8.42068	0.00274605	yes
XM_021611666.1	inf	0.0028337	yes
XM_021624577.1	inf	0.00283441	yes
XM_021618622.1	inf	0.00286372	yes
XM_021565493.1	inf	0.00287465	yes
XM_021622537.1	-10.1597	0.00287743	yes
XM_021562387.1	inf	0.00291545	yes
XM_021570553.1	-inf	0.00295719	yes
NM_001124463.1	3.49596	0.00299705	yes
XM_021564047.1	inf	0.00303193	yes
XM_021572257.1	inf	0.00310643	yes
XM_021586644.1	-inf	0.00312676	yes
XM_021586608.1	inf	0.00315099	yes
XM_021602917.1	7.71779	0.00323204	yes
XM_021601128.1	-inf	0.00326811	yes
XM_021620588.1	inf	0.00338502	yes
XM_021620590.1	inf	0.00344688	yes
XM_021568379.1	inf	0.00350294	yes
XM_021613189.1	inf	0.00352321	yes
XM_021574393.1	-inf	0.00355305	yes
XM_021586243.1	inf	0.00360614	yes
XM_021584235.1	-inf	0.00360614	yes
XM_021592139.1	inf	0.00360614	yes
XM_021624794.1	-inf	0.00363102	yes
XM_021579066.1	inf	0.00363122	yes
XM_021587710.1	-inf	0.00365753	yes
XM_021559427.1	inf	0.00365846	yes
XM_021585331.1	inf	0.0036588	yes
XM_021565498.1	inf	0.0036588	yes
XM_021578601.1	-inf	0.0036588	yes
XM_021565794.1	inf	0.00368024	yes
XM_021578897.1	inf	0.0037669	yes
XM_021609605.1	-inf	0.003845	yes
XM_021569387.1	inf	0.00387498	yes
XM_021624233.1	-inf	0.00389614	yes
XM_021584720.1	inf	0.00390018	yes
XM_021564023.1	8.59474	0.0039339	yes
XM_021578739.1	-inf	0.00398742	yes
XM_021607135.1	-inf	0.00403825	yes
XM_021565404.1	inf	0.00403825	yes
XM_021617268.1	-3.33869	0.0041291	yes
XM_021620517.1	-4.78501	0.00419755	yes
XM_021570288.1	-inf	0.00421419	yes
XM_021577466.1	inf	0.00425798	yes
XM_021560078.1	-inf	0.00427181	yes
XM_021615483.1	-inf	0.00435363	yes
XM_021607138.1	inf	0.00441226	yes
XM_021571167.1	5.1588	0.00441226	yes
XM_021597402.1	3.67528	0.00446463	yes
XM_021565497.1	inf	0.00447083	yes
XM_021589280.1	inf	0.00452457	yes
XM_021615823.1	inf	0.00467177	yes
XM_021558750.1	inf	0.00468404	yes
XM_021618994.1	inf	0.00468404	yes
XM_021565495.1	inf	0.00469725	yes
XM_021565812.1	inf	0.00480396	yes
XM_021589295.1	inf	0.00488157	yes
XM_021597190.1	inf	0.00493617	yes
XM_021625640.1	inf	0.00495727	yes
XM_021603040.1	-7.20946	0.00498219	yes
XM_021623740.1	inf	0.00502467	yes
XM_021599684.1	-inf	0.00505218	yes
XM_021557654.1	5.47242	0.00513604	yes
XM_021565112.1	-inf	0.00523916	yes
XR_002473600.1	inf	0.00527324	yes
XM_021606110.1	15.6371	0.00534824	yes
XM_021574020.1	-inf	0.00535633	yes
XR_002472164.1	-inf	0.00535633	yes
XM_021589719.1	inf	0.00535633	yes
XM_021615494.1	-8.13811	0.00536216	yes
XM_021610036.1	-inf	0.00540992	yes
XM_021565790.1	-inf	0.00551162	yes
XM_021565496.1	inf	0.00553155	yes
XR_002472359.1	-inf	0.00562147	yes
XM_021612977.1	inf	0.0056369	yes
XM_021565500.1	inf	0.00568407	yes
XM_021623685.1	-inf	0.00589044	yes
XM_021560001.1	-6.54492	0.0060684	yes
XM_021557170.1	-4.73229	0.00615872	yes
XM_021585017.1	-inf	0.0063113	yes
XM_021609368.1	inf	0.00639628	yes
XM_021565477.1	9.07003	0.00639628	yes
XM_021611341.1	11.2052	0.00643293	yes
XM_021565420.1	4.23917	0.00647208	yes
XM_021599701.1	-inf	0.0064807	yes
XM_021565499.1	inf	0.00648442	yes
XR_002469211.1	inf	0.00665422	yes
XM_021591940.1	-8.05781	0.00669137	yes
XM_021582766.1	-inf	0.00681412	yes
XM_021587657.1	inf	0.00688242	yes
XM_021607513.1	-4.9483	0.00694139	yes
XM_021561284.1	inf	0.00709078	yes
XM_021598251.1	inf	0.00712689	yes
XM_021569827.1	inf	0.00730683	yes
XM_021616975.1	inf	0.00743921	yes
XM_021594304.1	3.29048	0.00754374	yes
XM_021586390.1	inf	0.00760293	yes
XM_021597468.1	-inf	0.00779432	yes
XM_021616438.1	4.60149	0.00782089	yes
XM_021607084.1	-6.30682	0.00791422	yes
XM_021614325.1	-11.8469	0.00791422	yes
XM_021611721.1	4.13835	0.00792597	yes
XR_002473308.1	-inf	0.00812325	yes
XM_021565829.1	inf	0.00826267	yes
XM_021580167.1	-inf	0.0082978	yes
XR_002473667.1	-inf	0.00832267	yes
XM_021566178.1	inf	0.00832267	yes
XM_021607093.1	-6.85096	0.00832267	yes
XM_021562173.1	-inf	0.00835692	yes
XM_021582851.1	-inf	0.00892472	yes
XM_021582048.1	-11.0276	0.00909162	yes
XM_021565797.1	-inf	0.00928423	yes
XM_021603669.1	-inf	0.00934859	yes
XR_002470483.1	inf	0.00951652	yes
XR_002471160.1	-inf	0.0097175	yes
XM_021589476.1	3.97516	0.0098706	yes
XM_021614587.1	-10.3522	0.0103161	yes
XM_021568064.1	-inf	0.0104506	yes
XM_021610045.1	-4.04318	0.0105682	yes
XM_021611882.1	inf	0.010621	yes
XM_021569639.1	4.21169	0.0110456	yes
XM_021578614.1	-8.64883	0.0110952	yes
XM_021606770.1	4.49957	0.0111326	yes
XM_021559825.1	inf	0.0111607	yes
XR_002468046.1	-14.5169	0.0114648	yes
XM_021572111.1	inf	0.0116159	yes
XM_021590436.1	-inf	0.0116665	yes
XM_021606221.1	10.0969	0.0118188	yes
XM_021571031.1	inf	0.0120849	yes
XM_021572469.1	11.8269	0.0120849	yes
XM_021574053.1	4.42819	0.0121994	yes
XM_021570158.1	-10.7454	0.0124893	yes
XM_021603520.1	13.0421	0.0151662	yes
XM_021556725.1	-inf	0.0157552	yes
XM_021615710.1	inf	0.0161242	yes
XM_021600833.1	7.7108	0.0162475	yes
XM_021562804.1	inf	0.0169002	yes
XM_021611875.1	inf	0.017007	yes
XM_021610307.1	3.89367	0.0172094	yes
XM_021556758.1	-4.4181	0.0173269	yes
XM_021571622.1	-3.46452	0.0178443	yes
XM_021559394.1	inf	0.018224	yes
XM_021571030.1	inf	0.0182594	yes
XM_021565804.1	inf	0.0186966	yes
XM_021607814.1	-inf	0.0188581	yes
XM_021602283.1	7.95732	0.0190572	yes
XM_021576949.1	5.0922	0.0193002	yes
XM_021600193.1	-7.26369	0.0193862	yes
XM_021572470.1	inf	0.0195584	yes
XM_021571029.1	6.87556	0.0199908	yes
XM_021609438.1	-4.73816	0.0202129	yes
XM_021572383.1	-5.19766	0.0206351	yes
XM_021572106.1	-inf	0.0206965	yes
XM_021586654.1	inf	0.020827	yes
XM_021567107.1	inf	0.0218117	yes
XM_021572049.1	6.53834	0.0220937	yes
XM_021569759.1	inf	0.0221094	yes
XR_002470230.1	-inf	0.0225642	yes
XM_021579387.1	inf	0.0232322	yes
XM_021597027.1	-inf	0.023559	yes
XM_021610610.1	-inf	0.0237012	yes
XR_002474234.1	-4.80782	0.0239553	yes
XM_021559121.1	-3.23481	0.0240927	yes
XM_021580699.1	-4.77497	0.0240927	yes
XM_021573673.1	inf	0.0244756	yes
XM_021602916.1	-3.2434	0.0246722	yes
XM_021602200.1	inf	0.024848	yes
XM_021558630.1	4.96011	0.0251644	yes
XR_002473602.1	14.2314	0.0251703	yes
XM_021566427.1	inf	0.0255757	yes
XM_021590978.1	-inf	0.025957	yes
XM_021612268.1	-inf	0.0259895	yes
XM_021569532.1	inf	0.0259895	yes
XM_021589694.1	inf	0.0259895	yes
XM_021615579.1	-3.12057	0.026262	yes
XM_021580113.1	inf	0.026851	yes
XM_021563028.1	inf	0.0269041	yes
XM_021615915.1	-9.9438	0.0269594	yes
XR_002471214.1	inf	0.0271414	yes
XM_021566198.1	inf	0.0274407	yes
XM_021588266.1	-inf	0.0277196	yes
XM_021618313.1	4.81548	0.028018	yes
XM_021583651.1	-8.32365	0.0283093	yes
XM_021591688.1	3.65884	0.0285408	yes
XM_021612780.1	-6.8831	0.0288003	yes
XM_021611855.1	inf	0.0288693	yes
XM_021557323.1	inf	0.0289746	yes
XM_021621605.1	inf	0.0294845	yes
XM_021593156.1	inf	0.029486	yes
XM_021623598.1	5.68797	0.029486	yes
XM_021586653.1	inf	0.0296681	yes
XM_021607077.1	-5.45034	0.0301999	yes
XM_021589331.1	5.0373	0.0301999	yes
XM_021614798.1	inf	0.0305248	yes
XM_021601611.1	4.90683	0.030682	yes
XM_021580914.1	6.33791	0.0307954	yes
XM_021620805.1	inf	0.032109	yes
XM_021588028.1	-14.9199	0.0322163	yes
XM_021600907.1	inf	0.0323567	yes
XM_021588191.1	3.00951	0.0324966	yes
XM_021585372.1	-inf	0.0330758	yes
XM_021556880.1	-5.16658	0.0330937	yes
XM_021593365.1	-5.16471	0.0334459	yes
XM_021613586.1	7.48788	0.0335775	yes
XM_021582203.1	inf	0.0335896	yes
XM_021620089.1	-5.04839	0.0348502	yes
XM_021613813.1	3.83815	0.0349316	yes
XM_021623452.1	-inf	0.0353803	yes
XM_021559374.1	-inf	0.0357002	yes
XM_021558226.1	-inf	0.0357541	yes
XM_021572677.1	-3.51099	0.0359859	yes
XM_021591544.1	-inf	0.0360313	yes
XM_021557315.1	inf	0.0360313	yes
XM_021558290.1	7.44671	0.0365089	yes
XM_021620088.1	inf	0.0365089	yes
XM_021559958.1	5.45537	0.037777	yes
XM_021614685.1	3.7682	0.0391241	yes
XM_021570137.1	3.9126	0.0393226	yes
XM_021615671.1	-4.16751	0.0398879	yes
XM_021597328.1	6.4099	0.0400049	yes
XM_021623774.1	-inf	0.040969	yes
XM_021600555.1	6.99613	0.0411094	yes
XR_002474439.1	-5.53618	0.0413782	yes
XM_021562487.1	-inf	0.0415915	yes
XM_021600934.1	-inf	0.0419996	yes
XM_021574014.1	-8.47701	0.0423435	yes
XM_021605231.1	-inf	0.0442555	yes
XM_021576230.1	7.2602	0.0450578	yes
XM_021581311.1	-inf	0.0451698	yes
XM_021562858.1	inf	0.0454183	yes
XM_021620802.1	inf	0.0458134	yes
XM_021573897.1	inf	0.0459032	yes
XM_021571936.1	-inf	0.0464872	yes
XM_021619129.1	3.29492	0.0466235	yes
XR_002470682.1	-10.9279	0.0473286	yes
XM_021590527.1	-inf	0.047685	yes
XM_021600078.1	-7.05833	0.047685	yes
NM_001246337.1	-inf	0.047685	yes
XM_021563510.1	-inf	0.0489215	yes
XM_021565510.1	-inf	0.048923	yes
XM_021578882.1	inf	0.0497962	yes
NM_001124293.1	4.9967	0.0499535	yes
XM_021571505.1	-5.12699	0.0505966	no
XM_021589345.1	-inf	0.0508681	no
XM_021624231.1	-inf	0.0517138	no
XM_021606556.1	inf	0.0517778	no
XM_021610654.1	-inf	0.05187	no
XM_021563030.1	inf	0.0527823	no
XM_021600293.1	inf	0.0527823	no
XM_021625203.1	-inf	0.0529746	no
XM_021602645.1	-inf	0.0535301	no
XM_021599011.1	inf	0.0537894	no
XM_021604048.1	3.49241	0.0544956	no
XM_021560931.1	inf	0.0545593	no
XM_021584963.1	inf	0.0549557	no
XM_021608664.1	-3.52071	0.0550213	no
XM_021560506.1	-inf	0.0552364	no
XM_021602918.1	-3.2464	0.0553376	no
XM_021606589.1	inf	0.0554345	no
XM_021583323.1	inf	0.0558827	no
XM_021604343.1	inf	0.0564599	no
XM_021564203.1	inf	0.0565597	no
XM_021598753.1	inf	0.0567682	no
XM_021565486.1	6.30249	0.0570626	no
XM_021595962.1	3.88193	0.0570626	no
XM_021618991.1	inf	0.0576805	no
XM_021573996.1	inf	0.0577998	no
XM_021618494.1	-10.4469	0.0577998	no
XM_021602073.1	inf	0.0578773	no
XM_021592805.1	3.26257	0.0586864	no
XM_021571752.1	-5.56581	0.0591735	no
XM_021602799.1	-13.4671	0.0599521	no
XM_021605000.1	-inf	0.0601583	no
XM_021563240.1	inf	0.0604039	no
XR_002470869.1	4.38375	0.0607164	no
XM_021620617.1	-inf	0.0610711	no
XM_021618117.1	-3.56262	0.0610711	no
XM_021597417.1	-inf	0.0615183	no
XM_021587968.1	inf	0.0615565	no
XM_021597209.1	-4.043	0.0618949	no
XM_021603120.1	inf	0.0621945	no
XR_002475346.1	inf	0.0623935	no
XM_021604346.1	inf	0.063003	no
XM_021586295.1	inf	0.0648542	no
XM_021607640.1	inf	0.0654016	no
NM_001160589.1	-4.86291	0.0654222	no
XM_021615320.1	11.0496	0.0655759	no
XM_021563728.1	-inf	0.0656081	no
XM_021581155.1	-inf	0.0656118	no
XM_021605605.1	inf	0.065627	no
XM_021616301.1	inf	0.065627	no
XM_021557604.1	-5.78272	0.0660484	no
XM_021620800.1	inf	0.0664022	no
XM_021589511.1	-inf	0.0664673	no
XM_021565542.1	inf	0.067186	no
XM_021590822.1	inf	0.0674586	no
XM_021556884.1	inf	0.067506	no
XM_021604512.1	inf	0.0676313	no
XM_021614317.1	3.68597	0.0676889	no
XM_021580719.1	-inf	0.0678164	no
XR_002469503.1	-4.4186	0.0683738	no
XM_021585317.1	inf	0.0686671	no
XM_021583127.1	-4.54719	0.0687889	no
XM_021556422.1	inf	0.068968	no
XM_021568759.1	-5.29235	0.068968	no
XM_021593273.1	5.66545	0.0692449	no
XM_021575100.1	inf	0.0693491	no
XM_021597576.1	inf	0.0693491	no
XM_021620450.1	-inf	0.069408	no
XM_021560878.1	inf	0.069653	no
XM_021579877.1	inf	0.0696928	no
XM_021609060.1	-inf	0.0705281	no
XM_021590391.1	5.9355	0.0705702	no
XM_021580076.1	-6.33829	0.0714432	no
XM_021588045.1	-inf	0.0715355	no
XM_021606557.1	-7.36766	0.0737494	no
XM_021558880.1	-inf	0.0738747	no
XR_002469265.1	-inf	0.0749561	no
XM_021604418.1	inf	0.0759711	no
XM_021614012.1	inf	0.0765465	no
XM_021606573.1	inf	0.076869	no
XM_021597978.1	-inf	0.0770208	no
XM_021606538.1	inf	0.0770905	no
XM_021623544.1	-inf	0.0780304	no
XM_021604575.1	-inf	0.0781171	no
XM_021589547.1	-inf	0.0787319	no
XM_021606582.1	inf	0.0788766	no
XM_021593097.1	-inf	0.0790992	no
XM_021597867.1	9.26283	0.0797452	no
XM_021556226.1	inf	0.0797452	no
NM_001193326.1	3.02408	0.0798663	no
XM_021623873.1	4.37863	0.0798902	no
XM_021611780.1	-4.01113	0.0801369	no
XM_021618431.1	-inf	0.0802367	no
XM_021569608.1	-inf	0.0812344	no
XM_021608994.1	-inf	0.0812561	no
XM_021608993.1	-inf	0.0812561	no
XM_021604817.1	inf	0.0829954	no
XR_002471146.1	-inf	0.083136	no
XM_021582223.1	-inf	0.0844115	no
XM_021594573.1	-inf	0.0844115	no
XM_021575966.1	-inf	0.0852673	no
XM_021623347.1	inf	0.0854515	no
XM_021580731.1	-inf	0.0859163	no
XM_021607684.1	-11.1014	0.0863454	no
XM_021614197.1	-4.41627	0.0865525	no
XM_021569857.1	-2.91479	0.0866423	no
XM_021615467.1	-3.52085	0.0867749	no
XM_021579361.1	inf	0.087016	no
XM_021619589.1	inf	0.0870422	no
XM_021583301.1	inf	0.0882955	no
XM_021619832.1	2.70591	0.0885511	no
XM_021620536.1	-inf	0.089314	no
XM_021621479.1	-inf	0.0899311	no
XM_021608867.1	-7.51436	0.0904168	no
XM_021603031.1	inf	0.0906201	no
XM_021569644.1	-inf	0.0910833	no
XM_021589465.1	-9.07782	0.0910833	no
XM_021565488.1	5.88659	0.0911832	no
XM_021605233.1	-inf	0.0919766	no
XM_021560264.1	-inf	0.0920792	no
XM_021615546.1	-inf	0.0928835	no
XM_021567582.1	-inf	0.0928939	no
XR_002471147.1	6.54097	0.0929445	no
XM_021601487.1	-inf	0.0929445	no
XM_021557772.1	inf	0.0931734	no
NM_001281326.1	2.78165	0.0948083	no
XM_021620323.1	inf	0.0948083	no
XM_021562511.1	-inf	0.0948083	no
XM_021622983.1	-inf	0.0948284	no
XM_021618776.1	-4.17825	0.095217	no
XM_021612423.1	-5.62381	0.0954658	no
XM_021616038.1	inf	0.0971774	no
XM_021562899.1	-3.26784	0.0975478	no
XM_021608361.1	inf	0.0986966	no
XM_021585657.1	-inf	0.0992086	no
XM_021591494.1	inf	0.0999763	no
XM_021587676.1	-inf	0.100086	no
XM_021573962.1	3.72121	0.100574	no
XM_021598024.1	-6.70661	0.100574	no
XM_021616742.1	-inf	0.100697	no
XM_021561768.1	inf	0.101655	no
XM_021602642.1	-inf	0.102243	no
XM_021602301.1	-4.57703	0.103437	no
XM_021565280.1	6.80239	0.103647	no
XM_021598675.1	inf	0.103808	no
XM_021602637.1	-7.30661	0.103818	no
XM_021583299.1	inf	0.104511	no
XM_021613869.1	-2.75111	0.10486	no
XM_021607130.1	3.17389	0.10486	no
XM_021564652.1	inf	0.105085	no
XM_021579735.1	5.03124	0.105354	no
XM_021588831.1	-inf	0.105354	no
XM_021557635.1	-inf	0.105555	no
XM_021598812.1	4.61826	0.107159	no
XM_021614140.1	2.82144	0.108076	no
XM_021574501.1	-2.77388	0.110489	no
XM_021600543.1	-inf	0.112046	no
XM_021620907.1	-5.35176	0.112206	no
XM_021607076.1	-inf	0.112317	no
XM_021621792.1	-inf	0.112482	no
XM_021572271.1	3.0858	0.112501	no
XM_021607504.1	inf	0.113259	no
XM_021612420.1	-5.49558	0.11329	no
XM_021564621.1	inf	0.113594	no
XM_021579916.1	-inf	0.115209	no
XM_021621763.1	-7.16589	0.116081	no
XM_021559959.1	5.28096	0.119782	no
XM_021589030.1	5.00954	0.120292	no
XM_021564945.1	-inf	0.122113	no
XM_021584142.1	-6.82884	0.122113	no
XM_021603639.1	-15.549	0.122567	no
XM_021561232.1	-4.99726	0.128471	no
XM_021612337.1	-6.49718	0.130624	no
XM_021557791.1	3.75994	0.13554	no
XM_021595779.1	2.30714	0.136192	no
XM_021574616.1	8.55778	0.137429	no
XM_021583642.1	2.99394	0.14072	no
XM_021591730.1	2.67137	0.141028	no
XM_021617635.1	-4.39746	0.14194	no
XM_021568682.1	-4.15133	0.14421	no
XM_021582402.1	5.25754	0.14436	no
XM_021620769.1	4.01433	0.144373	no
XM_021600575.1	-13.1653	0.144418	no
XM_021557053.1	2.84058	0.148597	no
XM_021571735.1	-2.59119	0.155629	no
NM_001124185.1	-4.49745	0.155841	no
XM_021625066.1	-3.40566	0.156149	no
XM_021612984.1	-6.29456	0.158876	no
XM_021562788.1	-6.53516	0.159234	no
XM_021569153.1	10.5958	0.159234	no
XM_021603266.1	3.70695	0.159234	no
XM_021588105.1	3.02588	0.160147	no
XM_021568756.1	-3.26982	0.165214	no
XM_021603886.1	3.30317	0.165512	no
XM_021612421.1	-5.6012	0.165995	no
XM_021598498.1	12.9946	0.166756	no
XM_021584136.1	-5.96421	0.167203	no
XM_021622516.1	-5.14323	0.167479	no
XM_021589281.1	9.88502	0.168283	no
XM_021581143.1	2.71881	0.168283	no
XM_021609626.1	4.6342	0.178396	no
XM_021561269.1	-3.79224	0.179111	no
XM_021618060.1	-5.67575	0.179979	no
XM_021584557.1	-3.2122	0.182705	no
XM_021599133.1	6.97478	0.184842	no
XM_021558855.1	-4.46448	0.186286	no
XM_021606025.1	2.57083	0.187455	no
XM_021572040.1	4.23228	0.187698	no
XM_021616279.1	3.50959	0.189226	no
XM_021579122.1	5.54542	0.189535	no
XM_021565870.1	-5.15804	0.190977	no
XM_021564716.1	-5.41322	0.19283	no
XM_021584144.1	-7.4017	0.1934	no
XM_021571895.1	3.85293	0.194405	no
XM_021576221.1	4.90947	0.195216	no
XM_021616010.1	-6.90958	0.195612	no
XM_021611058.1	3.09878	0.199422	no
XM_021586762.1	-5.70626	0.200997	no
XM_021578036.1	-5.40389	0.200997	no
XM_021585250.1	5.02332	0.203848	no
XM_021570297.1	-9.65159	0.203951	no
XM_021588292.1	3.42864	0.205663	no
XM_021623028.1	4.81446	0.209391	no
XM_021612422.1	-4.95554	0.210124	no
XM_021570467.1	-2.52008	0.211692	no
XM_021618194.1	7.96763	0.212618	no
XM_021618312.1	2.50669	0.214686	no
XM_021604067.1	-4.94136	0.215134	no
XM_021602839.1	3.85194	0.215294	no
XM_021625611.1	-3.03129	0.220665	no
XM_021566768.1	-3.0516	0.223622	no
XM_021600146.1	6.64082	0.22626	no
XM_021622012.1	-2.5868	0.22908	no
NM_001124376.1	3.48677	0.230143	no
XM_021577237.1	-5.45172	0.230932	no
XM_021614686.1	-7.69755	0.23283	no
XM_021616910.1	-6.23954	0.234013	no
XM_021571191.1	-5.29678	0.235665	no
XM_021579966.1	-3.49744	0.235665	no
XM_021582007.1	-2.88102	0.23765	no
XM_021618698.1	2.12117	0.238232	no
XM_021563168.1	3.23881	0.242528	no
XM_021606751.1	6.58963	0.243044	no
XM_021610041.1	3.70109	0.247225	no
XM_021615827.1	5.72495	0.249603	no
XM_021616014.1	-6.30864	0.251236	no
XM_021563691.1	5.12928	0.25498	no
XM_021560619.1	-3.67058	0.255492	no
XM_021581117.1	2.2126	0.259722	no
XM_021625745.1	2.39942	0.260686	no
XM_021571737.1	2.5873	0.265307	no
XM_021569609.1	-3.70301	0.265676	no
XM_021621655.1	-3.99301	0.266421	no
XM_021613868.1	-2.65278	0.266579	no
XM_021612187.1	6.40842	0.268304	no
XM_021623451.1	-5.40945	0.276531	no
XM_021618986.1	-3.92604	0.276531	no
XM_021616349.1	3.28532	0.276818	no
XM_021619215.1	4.42953	0.282292	no
XM_021586010.1	1.94479	0.284585	no
XM_021600028.1	-4.12558	0.285613	no
XM_021580175.1	-5.73465	0.293896	no
XM_021616013.1	-6.2339	0.302824	no
XM_021606734.1	-4.44077	0.305666	no
XM_021593396.1	2.39747	0.309041	no
XM_021616016.1	2.17855	0.313265	no
XM_021612669.1	-5.08629	0.315248	no
XM_021589347.1	-5.4677	0.317659	no
XM_021561023.1	-6.11362	0.318957	no
XM_021595961.1	2.84454	0.320051	no
XM_021592856.1	-2.75211	0.320058	no
XM_021620765.1	-3.48372	0.320366	no
XM_021616277.1	-3.43427	0.320366	no
NM_001124436.1	1.92594	0.32138	no
XM_021610168.1	3.38167	0.322685	no
XM_021620019.1	4.76469	0.322685	no
XM_021607573.1	1.91735	0.330612	no
XM_021610265.1	-2.30931	0.330612	no
XM_021567849.1	-5.12996	0.331181	no
XM_021617181.1	-5.66971	0.333282	no
XM_021558740.1	-3.48444	0.337767	no
XM_021571738.1	-3.79621	0.342099	no
XM_021579269.1	-4.74888	0.344503	no
XM_021560336.1	-2.87356	0.345117	no
XM_021617833.1	7.90521	0.346819	no
XM_021600455.1	2.83846	0.34896	no
XM_021591229.1	-2.82248	0.356834	no
XR_002473216.1	-4.77474	0.359901	no
XM_021589200.1	2.57815	0.362336	no
XM_021610058.1	1.87777	0.363853	no
XM_021599376.1	-3.83215	0.364184	no
XM_021585571.1	-4.32248	0.364658	no
XM_021603589.1	3.73233	0.368554	no
XM_021607716.1	-2.53309	0.371047	no
XM_021577593.1	-3.1434	0.373307	no
XM_021614333.1	-4.33371	0.378117	no
XM_021609096.1	2.36247	0.378117	no
XM_021563690.1	-4.53651	0.382956	no
XM_021557651.1	3.11815	0.383569	no
XM_021591929.1	-2.79018	0.385521	no
XM_021613420.1	-2.10865	0.386782	no
XM_021585028.1	2.55557	0.388738	no
XM_021569562.1	1.83995	0.39272	no
XM_021615620.1	6.91101	0.394431	no
XM_021580469.1	-3.65556	0.394486	no
XM_021564016.1	3.69813	0.398044	no
XM_021617419.1	-3.81839	0.400505	no
XM_021578811.1	-3.88476	0.401471	no
XM_021563290.1	1.90093	0.403138	no
XM_021618556.1	-2.24587	0.406084	no
XM_021572335.1	-2.62432	0.407359	no
XM_021600405.1	-6.26235	0.407939	no
XM_021620707.1	3.8185	0.41602	no
XM_021610069.1	2.29335	0.416803	no
XM_021616507.1	4.55552	0.424847	no
XM_021586310.1	-2.42839	0.42505	no
XM_021622545.1	-4.93991	0.429791	no
XM_021576985.1	-3.88209	0.433143	no
XM_021622521.1	-4.8932	0.441067	no
XM_021615443.1	-4.22511	0.444966	no
XM_021562955.1	-2.08385	0.445623	no
XM_021569368.1	2.07196	0.447397	no
XM_021610517.1	-2.49089	0.449552	no
XM_021571876.1	2.7718	0.450027	no
XM_021564596.1	2.6062	0.454042	no
XM_021615485.1	5.14839	0.45516	no
XM_021556426.1	6.23053	0.455921	no
XM_021620988.1	2.02766	0.458858	no
XM_021604540.1	-2.43546	0.459308	no
XM_021578595.1	3.59362	0.464543	no
XM_021621002.1	-4.20444	0.466302	no
XM_021624364.1	-2.6433	0.468422	no
XM_021597875.1	-2.09913	0.46889	no
XM_021590052.1	-2.34561	0.470499	no
XM_021621908.1	-2.11668	0.477263	no
NM_001124325.1	2.93616	0.478213	no
NM_001161448.1	-2.98692	0.487039	no
XM_021562898.1	-3.51602	0.489708	no
XM_021617829.1	2.6329	0.489708	no
XM_021586004.1	-3.09107	0.490103	no
XM_021595809.1	2.53512	0.490231	no
XM_021611405.1	1.71148	0.491052	no
XM_021589359.1	-4.7252	0.491616	no
XM_021571037.1	-2.79056	0.491745	no
XM_021608565.1	-4.74245	0.496365	no
XM_021602507.1	-7.30341	0.498463	no
XM_021610708.1	2.67726	0.498935	no
XM_021559073.1	-2.85157	0.500059	no
XM_021558367.1	6.7977	0.500682	no
XM_021559955.1	4.56044	0.501571	no
XM_021557321.1	-2.26671	0.505413	no
XM_021604043.1	-6.02191	0.505588	no
XM_021567983.1	3.0628	0.509984	no
XM_021571378.1	-5.21055	0.513943	no
XM_021585463.1	-2.62888	0.513943	no
XM_021603009.1	-3.12877	0.514214	no
XM_021616439.1	1.92541	0.514214	no
XM_021602813.1	2.33419	0.515247	no
XM_021604323.1	2.56885	0.516594	no
XM_021592639.1	2.32636	0.516594	no
XM_021557388.1	-7.10424	0.516594	no
XM_021600474.1	4.9905	0.523171	no
XM_021597789.1	-2.94437	0.527316	no
XM_021569876.1	3.68595	0.528639	no
XM_021571256.1	-2.66193	0.532944	no
XM_021563359.1	-2.14285	0.532944	no
XM_021589466.1	-2.8647	0.534447	no
XM_021585071.1	-2.45853	0.535317	no
NM_001171901.1	-2.7717	0.539678	no
XR_002472947.1	2.5719	0.540777	no
NM_001124621.1	2.54061	0.543596	no
XM_021569720.1	1.79733	0.545904	no
XM_021584976.1	2.01848	0.546732	no
XM_021623400.1	-4.95934	0.548623	no
XR_002470956.1	2.76176	0.550689	no
XM_021625674.1	3.58969	0.555025	no
XM_021565696.1	2.79176	0.555359	no
XM_021573312.1	3.16173	0.560593	no
XM_021572750.1	-2.21472	0.565628	no
XM_021625459.1	-1.90074	0.565628	no
XM_021598357.1	-3.15569	0.568844	no
XM_021566933.1	-2.40524	0.569459	no
XM_021603051.1	-4.91341	0.577591	no
XM_021592094.1	-2.72857	0.581696	no
XM_021579365.1	1.92998	0.58339	no
XM_021560561.1	-2.62737	0.586874	no
XM_021592911.1	2.3066	0.589552	no
XM_021565808.1	-4.70984	0.592519	no
XM_021621142.1	-6.63043	0.59717	no
XM_021562732.1	1.79174	0.598754	no
XM_021576119.1	1.6822	0.599456	no
XM_021625684.1	1.82793	0.606936	no
XM_021616248.1	4.20076	0.609967	no
XR_002469661.1	4.15864	0.610634	no
XM_021589154.1	-2.85718	0.61097	no
XM_021589195.1	3.568	0.612738	no
XM_021558704.1	-2.18321	0.61472	no
XM_021568706.1	3.03734	0.615036	no
XM_021602157.1	1.74207	0.616036	no
XM_021582670.1	-4.85018	0.618628	no
XM_021606673.1	-3.20631	0.619343	no
XM_021585999.1	4.28024	0.623959	no
XM_021576996.1	4.59858	0.628011	no
XM_021601799.1	2.03094	0.635726	no
XM_021576743.1	2.53101	0.6405	no
XM_021620709.1	5.01653	0.641243	no
XM_021580647.1	2.77125	0.643461	no
XM_021576025.1	-4.42216	0.64356	no
XM_021558443.1	-2.98737	0.64477	no
XR_002473184.1	4.03207	0.64602	no
XM_021597134.1	-1.94794	0.64602	no
XM_021579443.1	-6.04441	0.646249	no
XM_021608216.1	3.69642	0.646358	no
XM_021586921.1	1.77721	0.653434	no
XM_021623450.1	1.84157	0.661474	no
XM_021568003.1	-2.18009	0.668713	no
XM_021622501.1	-4.97991	0.669561	no
XR_002473271.1	2.69449	0.670378	no
XM_021606718.1	2.97553	0.671404	no
XM_021609907.1	4.12883	0.6727	no
XM_021565168.1	-2.0061	0.6727	no
XM_021566953.1	2.73704	0.674459	no
XM_021569758.1	1.81804	0.674459	no
XM_021604689.1	-6.66223	0.676987	no
XM_021579364.1	1.68699	0.682025	no
XM_021558854.1	1.86221	0.686266	no
XM_021574545.1	3.79807	0.686266	no
XM_021566238.1	3.78147	0.697167	no
XM_021606038.1	1.6106	0.69751	no
XM_021604127.1	-3.30682	0.700766	no
XR_002469558.1	1.96127	0.701923	no
XM_021571691.1	2.17419	0.702427	no
XM_021609824.1	-2.54586	0.703455	no
XM_021620640.1	-2.73022	0.703455	no
XM_021585182.1	-2.71431	0.704045	no
XM_021593174.1	-2.12353	0.704045	no
XM_021578617.1	-2.17978	0.712429	no
XM_021595479.1	-2.61676	0.713458	no
XM_021574505.1	-2.18168	0.713458	no
XM_021587683.1	2.09576	0.714599	no
XM_021576630.1	1.79106	0.715974	no
XM_021623643.1	2.98782	0.715974	no
XM_021596873.1	3.58271	0.716053	no
XM_021621821.1	-2.60019	0.725521	no
XR_002471009.1	3.47405	0.728216	no
XM_021623937.1	-2.83558	0.736098	no
XM_021616539.1	-3.31444	0.736669	no
XM_021624875.1	2.61493	0.738265	no
XM_021614788.1	3.87477	0.742534	no
XM_021600077.1	2.10551	0.744165	no
XM_021561103.1	-1.84576	0.751558	no
XM_021582314.1	-4.36545	0.752053	no
XM_021586202.1	-2.34571	0.754752	no
XM_021581208.1	1.52768	0.75576	no
XM_021622567.1	3.00945	0.759686	no
XM_021586784.1	-2.26078	0.759686	no
XM_021623042.1	3.24781	0.759908	no
XM_021581310.1	1.60013	0.762993	no
XM_021563280.1	2.52337	0.763037	no
XM_021567225.1	-2.2088	0.764287	no
XM_021566961.1	2.41798	0.766635	no
XM_021577340.1	-5.42851	0.766635	no
XM_021564838.1	2.93963	0.768132	no
XM_021560100.1	-2.86952	0.771209	no
XM_021561576.1	5.26453	0.772794	no
XM_021565455.1	-3.48231	0.773181	no
XM_021610247.1	-1.79154	0.773259	no
XM_021616830.1	-4.06824	0.775723	no
XM_021623488.1	-4.15014	0.780793	no
XM_021570010.1	-2.74301	0.783537	no
XM_021576524.1	2.36239	0.786148	no
XM_021560097.1	4.19993	0.788116	no
XM_021557230.1	4.34309	0.794803	no
XM_021578165.1	-3.56108	0.79941	no
XM_021574546.1	4.25852	0.800821	no
XM_021598406.1	-2.51084	0.801725	no
XM_021579550.1	-5.51795	0.806741	no
XM_021582622.1	2.58558	0.811365	no
XM_021583426.1	-2.33136	0.81348	no
XM_021613870.1	-2.29552	0.820113	no
XM_021561174.1	-2.93466	0.824942	no
XM_021572266.1	-3.2102	0.827584	no
XM_021607505.1	4.09441	0.82858	no
XM_021614759.1	1.64548	0.830157	no
XM_021624259.1	2.29522	0.831399	no
XM_021615684.1	-2.67662	0.831523	no
XM_021557548.1	1.54227	0.832313	no
XR_002474617.1	-2.19163	0.832411	no
XM_021576024.1	1.67467	0.834595	no
XM_021560875.1	-3.0046	0.834841	no
XM_021576484.1	1.96551	0.836706	no
XM_021617037.1	-2.10918	0.837632	no
NM_001171899.1	2.20353	0.843145	no
XM_021558355.1	-3.28141	0.843209	no
XM_021583232.1	1.63988	0.844074	no
XM_021616440.1	2.45614	0.846195	no
XM_021569765.1	1.65162	0.846195	no
XM_021625345.1	-2.57797	0.846656	no
XM_021557661.1	-3.66044	0.846804	no
XM_021624651.1	1.61433	0.850726	no
XM_021557257.1	-1.98315	0.85533	no
XM_021597075.1	-2.75034	0.85533	no
XM_021618114.1	3.89752	0.857948	no
XM_021573113.1	1.92436	0.86099	no
XM_021574392.1	5.57009	0.862295	no
XM_021612773.1	3.57484	0.868794	no
XM_021604225.1	1.76595	0.870833	no
XM_021558672.1	-1.7886	0.882082	no
XM_021557650.1	-3.13304	0.882867	no
XM_021564208.1	-4.26772	0.882867	no
XM_021571080.1	3.19488	0.897914	no
XM_021624859.1	2.11803	0.905587	no
XM_021599053.1	-3.08452	0.906312	no
XM_021578980.1	1.45523	0.906312	no
XM_021607681.1	2.15513	0.911509	no
XM_021574912.1	-6.00692	0.914439	no
XR_002470867.1	-2.16353	0.917882	no
XM_021615419.1	-3.78554	0.924912	no
XM_021613809.1	-3.03774	0.933513	no
XM_021607268.1	4.453	0.934834	no
XM_021590502.1	2.49831	0.936472	no
XM_021610598.1	2.84675	0.93762	no
XM_021619936.1	3.18126	0.937846	no
XM_021614666.1	-2.97468	0.941385	no
XM_021577869.1	2.14617	0.942715	no
XM_021619304.1	4.95718	0.943979	no
XM_021605860.1	-4.7198	0.944808	no
XM_021565457.1	-3.97828	0.947401	no
XM_021609505.1	-1.87658	0.949711	no
XM_021594363.1	2.16698	0.95099	no
XM_021607793.1	-3.58758	0.952993	no
XM_021611413.1	2.00311	0.952993	no
XM_021556627.1	2.40233	0.954506	no
XM_021577415.1	3.76754	0.954506	no
XR_002472079.1	4.6781	0.959103	no
XM_021624261.1	4.41022	0.973294	no
XM_021605594.1	-2.23491	0.973341	no
XM_021607020.1	3.5318	0.977197	no
XM_021564088.1	-4.20355	0.977275	no
XM_021584899.1	1.4405	0.978801	no
XM_021618208.1	-2.14559	0.986358	no
XM_021590536.1	3.64525	0.986506	no
XM_021614779.1	2.85317	0.988644	no
XM_021577545.1	2.20424	0.992713	no
XM_021609106.1	-1.94068	0.994207	no
XM_021600964.1	1.82813	0.995432	no
XM_021571798.1	-3.18577	0.999053	no
XM_021564216.1	-3.27136	1	no
XM_021603204.1	5.54891	1	no
XM_021620581.1	2.70657	1	no
XM_021580710.1	1.62438	1	no
XM_021581929.1	1.53567	1	no
XM_021567653.1	3.19939	1	no
XM_021610627.1	-1.85627	1	no
XM_021581356.1	1.87087	1	no
XM_021599283.1	2.22323	1	no
XM_021592118.1	1.48114	1	no
XM_021586269.1	-2.39555	1	no
XM_021559956.1	3.41553	1	no
XR_002468857.1	2.90776	1	no
XM_021622489.1	-4.46093	1	no
XM_021580848.1	2.00473	1	no
XM_021587567.1	1.53563	1	no
XR_002472408.1	-3.09107	1	no
XM_021592948.1	3.43087	1	no
XR_002469466.1	-4.76665	1	no
XM_021620238.1	3.0969	1	no
XM_021578868.1	2.10993	1	no
XM_021598977.1	1.75023	1	no
XM_021613215.1	-5.71017	1	no
XM_021560809.1	-4.56872	1	no
XM_021579872.1	2.32543	1	no
XM_021599484.1	2.44563	1	no
XM_021567114.1	2.18048	1	no
XM_021585523.1	-2.10565	1	no
XM_021589183.1	-2.8797	1	no
XM_021621812.1	-1.97914	1	no
XM_021588199.1	2.78871	1	no
XM_021608604.1	1.49546	1	no
XR_002469591.1	-3.53998	1	no
XM_021589532.1	-2.70967	1	no
XM_021574254.1	5.04726	1	no
XM_021610123.1	-2.66188	1	no
XM_021621987.1	4.32371	1	no
XM_021582669.1	1.39411	1	no
XM_021562901.1	-3.8259	1	no
XM_021607507.1	-1.98606	1	no
XM_021560573.1	-3.77833	1	no
XM_021563544.1	-1.63	1	no
XM_021604135.1	-2.00637	1	no
XM_021566931.1	-2.16448	1	no
XM_021615088.1	-1.93475	1	no
XM_021596054.1	-1.83597	1	no
XM_021564310.1	2.36516	1	no
XR_002471132.1	2.33345	1	no
XM_021571578.1	2.13105	1	no
XM_021580604.1	-2.25097	1	no
XM_021568228.1	4.79149	1	no
XM_021612966.1	1.85748	1	no
XM_021589621.1	-2.22433	1	no
XM_021615065.1	1.68484	1	no
XM_021609642.1	1.91954	1	no
XM_021582400.1	-4.01957	1	no
XR_002474037.1	-4.53112	1	no
XM_021624113.1	-2.36433	1	no
XM_021569343.1	3.5468	1	no
XM_021605981.1	4.54194	1	no
XM_021584860.1	-2.32585	1	no
XM_021624479.1	3.71893	1	no
XM_021562618.1	-2.70396	1	no
XM_021602594.1	3.49215	1	no
XM_021587249.1	-3.45876	1	no
XM_021598492.1	4.41878	1	no
XM_021591273.1	-3.01228	1	no
XM_021594071.1	2.04983	1	no
XM_021585937.1	-1.83446	1	no
XM_021577103.1	-2.24364	1	no
XM_021579533.1	-2.40166	1	no
XM_021620959.1	-2.6077	1	no
XM_021594305.1	3.38052	1	no
XM_021557595.1	-2.3328	1	no
XM_021575552.1	4.21297	1	no
XM_021609210.1	-5.55608	1	no
XM_021570011.1	2.85302	1	no
XM_021574364.1	3.70744	1	no
XM_021572327.1	2.6355	1	no
XM_021562953.1	-3.23366	1	no
XM_021596841.1	2.05238	1	no
XM_021571690.1	3.5924	1	no
XM_021597132.1	2.35836	1	no
XM_021588579.1	-2.58008	1	no
XM_021592375.1	4.30741	1	no
XM_021616176.1	4.86614	1	no
XM_021576093.1	-4.49608	1	no
XM_021620987.1	-2.58655	1	no
XM_021571856.1	1.77232	1	no
XM_021607152.1	-2.83908	1	no
XM_021618131.1	1.36479	1	no
XR_002471688.1	-2.20838	1	no
XM_021603159.1	2.04943	1	no
XM_021596866.1	-2.04531	1	no
XM_021598975.1	1.66798	1	no
XM_021589907.1	2.62349	1	no
XM_021591691.1	3.56615	1	no
XM_021585263.1	-2.4418	1	no
XM_021620893.1	3.55676	1	no
XM_021624217.1	1.42212	1	no
NM_001165177.1	-1.86028	1	no
XM_021606721.1	-2.22151	1	no
XM_021604297.1	4.46387	1	no
XM_021600585.1	2.09262	1	no
XM_021616614.1	2.34588	1	no
XM_021575753.1	-1.77408	1	no
XM_021582086.1	1.47388	1	no
XM_021609056.1	-5.19144	1	no
XM_021595410.1	1.50192	1	no
XM_021611818.1	2.2994	1	no
XM_021570283.1	-3.69679	1	no
XM_021556610.1	1.64867	1	no
XR_002469194.1	-1.86678	1	no
XM_021570925.1	-2.18928	1	no
XM_021603032.1	-4.85613	1	no
XM_021563487.1	1.95825	1	no
XM_021609583.1	-2.3743	1	no
XM_021609463.1	1.96702	1	no
XM_021577087.1	2.64447	1	no
XM_021603364.1	-5.28428	1	no
XM_021623662.1	-3.70504	1	no
XM_021561877.1	-2.05703	1	no
XM_021579270.1	5.09532	1	no
XM_021559906.1	-2.41084	1	no
XM_021621984.1	1.97995	1	no
XM_021562389.1	2.96088	1	no
XM_021580610.1	1.70647	1	no
XM_021573891.1	5.07784	1	no
XR_002468095.1	-1.77913	1	no
XM_021600285.1	-1.84596	1	no
XM_021598402.1	-2.51828	1	no
XM_021559376.1	-2.23227	1	no
XM_021557098.1	1.84022	1	no
XM_021577494.1	1.86944	1	no
XM_021561156.1	-2.85289	1	no
XM_021618473.1	-3.67824	1	no
XM_021618315.1	1.53701	1	no
XM_021625699.1	-1.96229	1	no
XM_021602004.1	-2.49284	1	no
XM_021560804.1	-3.42609	1	no
XM_021624234.1	-2.91528	1	no
XM_021564822.1	3.47005	1	no
XM_021566010.1	1.35324	1	no
XM_021586544.1	2.1526	1	no
XM_021600601.1	-4.24249	1	no
XM_021624661.1	2.36329	1	no
XM_021567140.1	-1.55408	1	no
XM_021577194.1	5.03143	1	no
XM_021611909.1	-1.89951	1	no
NM_001124480.1	1.86473	1	no
XM_021587291.1	1.94394	1	no
XM_021579547.1	-2.1475	1	no
XM_021580411.1	3.82039	1	no
XM_021609369.1	-1.94867	1	no
XM_021558397.1	-2.16595	1	no
XM_021619568.1	-2.43708	1	no
XM_021580539.1	-4.59332	1	no
XM_021600781.1	-3.61057	1	no
XM_021617403.1	1.99902	1	no
XM_021572154.1	-3.63219	1	no
XM_021616353.1	-3.04127	1	no
XM_021560329.1	-2.13495	1	no
XM_021557655.1	1.30892	1	no
XM_021605467.1	-3.34086	1	no
XM_021572216.1	-3.36942	1	no
XM_021567212.1	-2.45387	1	no
XM_021568799.1	-2.84515	1	no
XM_021591593.1	1.63015	1	no
XM_021566011.1	1.26417	1	no
XM_021617992.1	-2.18968	1	no
XM_021621822.1	-2.10807	1	no
XM_021571390.1	3.56756	1	no
XM_021574190.1	2.03426	1	no
XM_021613793.1	-2.32445	1	no
XM_021597564.1	1.83153	1	no
XM_021578284.1	-2.00338	1	no
XM_021583759.1	2.18862	1	no
XM_021565042.1	-2.42691	1	no
XM_021609277.1	-2.87979	1	no
XM_021586580.1	1.62682	1	no
XM_021622509.1	-2.30653	1	no
XM_021591778.1	-3.08924	1	no
XM_021565784.1	2.58082	1	no
XM_021599316.1	-2.5089	1	no
XM_021557008.1	2.17632	1	no
XM_021559504.1	1.66478	1	no
XM_021614988.1	1.4313	1	no
XM_021561565.1	1.45451	1	no
XM_021580239.1	1.93292	1	no
XM_021578054.1	2.21312	1	no
XM_021561429.1	-2.13833	1	no
XM_021591703.1	-2.87634	1	no
XM_021560646.1	1.32244	1	no
XM_021617024.1	-1.61215	1	no
XM_021558868.1	2.73042	1	no
XM_021621292.1	-2.04784	1	no
XM_021580086.1	-4.32864	1	no
XM_021615319.1	-3.89096	1	no
XM_021574860.1	-2.50684	1	no
XM_021590778.1	2.14658	1	no
XM_021565946.1	-3.03246	1	no
NM_001160645.1	-2.06796	1	no
XM_021559561.1	-2.07436	1	no
XM_021571960.1	-3.87521	1	no
XM_021580134.1	-1.99926	1	no
XM_021570981.1	-1.83651	1	no
XM_021589230.1	2.88189	1	no
XM_021611714.1	-4.12231	1	no
XM_021604572.1	2.62911	1	no
XM_021600376.1	-1.7561	1	no
XM_021576120.1	1.30422	1	no
XM_021591215.1	-2.3545	1	no
XM_021599324.1	1.54161	1	no
XM_021622703.1	1.42792	1	no
XM_021573451.1	2.29787	1	no
XM_021599812.1	1.28283	1	no
XM_021612364.1	-2.35654	1	no
XM_021582006.1	1.45521	1	no
XR_002470274.1	-3.43412	1	no
XM_021594947.1	1.7821	1	no
XM_021562213.1	1.34602	1	no
XM_021577841.1	1.45962	1	no
XM_021577840.1	-2.77387	1	no
XM_021561316.1	2.36112	1	no
XM_021587497.1	-3.1927	1	no
XM_021571653.1	-2.99196	1	no
XM_021611626.1	3.73413	1	no
XM_021615951.1	2.54394	1	no
XM_021598502.1	-2.46417	1	no
XM_021561394.1	-1.89561	1	no
XM_021615911.1	4.23557	1	no
XM_021560847.1	4.7497	1	no
XM_021598486.1	-2.38745	1	no
XM_021609909.1	-1.71448	1	no
XR_002472623.1	-2.25255	1	no
XM_021617772.1	3.02758	1	no
XM_021567043.1	-2.00896	1	no
XM_021595493.1	-1.9099	1	no
XM_021616233.1	1.78576	1	no
XM_021624115.1	-2.46729	1	no
XM_021572060.1	3.34873	1	no
XM_021598183.1	1.66131	1	no
XM_021605008.1	1.94982	1	no
XM_021599414.1	-2.07734	1	no
XM_021603808.1	1.58756	1	no
XM_021622559.1	-2.84123	1	no
XM_021582031.1	-2.14489	1	no
XM_021581036.1	2.05106	1	no
XM_021624366.1	-3.72846	1	no
XM_021585945.1	1.65066	1	no
XM_021599110.1	1.39239	1	no
XM_021599691.1	2.34996	1	no
XM_021620126.1	2.46462	1	no
XM_021601539.1	-4.7453	1	no
XM_021579256.1	-1.85976	1	no
XM_021589491.1	-2.27814	1	no
XM_021579950.1	-1.9993	1	no
XM_021576471.1	-1.66388	1	no
XM_021569955.1	-2.85247	1	no
XM_021568929.1	-2.21542	1	no
XM_021577591.1	-2.14809	1	no
XM_021570043.1	-1.74335	1	no
XM_021607549.1	-2.4569	1	no
XM_021618366.1	2.60303	1	no
XM_021606048.1	4.27645	1	no
XM_021569392.1	-3.50114	1	no
XM_021559343.1	-1.714	1	no
XM_021592964.1	3.36985	1	no
XM_021586599.1	2.14351	1	no
XM_021560558.1	1.49093	1	no
XM_021603862.1	-2.27491	1	no
XM_021570952.1	2.5473	1	no
XM_021622506.1	-3.74498	1	no
XM_021584107.1	-1.94924	1	no
XM_021605823.1	-2.1648	1	no
XM_021603323.1	1.34616	1	no
XM_021603414.1	1.3307	1	no
XM_021622738.1	-2.10974	1	no
XM_021588019.1	-3.40298	1	no
XM_021558599.1	-1.70609	1	no
XM_021561944.1	1.49419	1	no
XM_021580816.1	2.3941	1	no
XM_021616690.1	-2.86329	1	no
XM_021569380.1	-1.92972	1	no
XR_002470384.1	-1.99416	1	no
XM_021559337.1	-2.06798	1	no
XM_021564406.1	3.19922	1	no
XM_021617421.1	-2.78208	1	no
XM_021602565.1	-4.10508	1	no
XM_021559060.1	3.73885	1	no
XM_021580718.1	-2.9676	1	no
XM_021582380.1	-1.56212	1	no
XM_021591441.1	1.57789	1	no
XM_021607638.1	1.70343	1	no
XM_021616651.1	-3.10155	1	no
XM_021568286.1	-2.74657	1	no
XM_021560106.1	3.46114	1	no
XM_021614078.1	-2.04277	1	no
XM_021602221.1	-2.76319	1	no
XM_021576480.1	1.61876	1	no
XM_021606475.1	-1.96389	1	no
XM_021585254.1	-2.5285	1	no
XM_021624527.1	-1.66832	1	no
XM_021593492.1	1.66164	1	no
XM_021582967.1	-1.55761	1	no
XR_002474397.1	-2.27083	1	no
XM_021573888.1	-1.7354	1	no
XM_021604018.1	1.72035	1	no
XM_021616986.1	-2.09205	1	no
XM_021606199.1	-3.74055	1	no
XM_021615644.1	2.3384	1	no
XM_021581534.1	2.47772	1	no
XM_021616170.1	-3.38409	1	no
XM_021591434.1	-2.78011	1	no
XM_021585085.1	-1.68632	1	no
XM_021605831.1	2.35682	1	no
XM_021580997.1	1.84102	1	no
XM_021624383.1	-2.2836	1	no
XM_021583013.1	1.70676	1	no
XM_021617955.1	1.66504	1	no
XM_021615760.1	2.49037	1	no
XM_021595188.1	2.45891	1	no
XM_021563634.1	-1.63859	1	no
XM_021588935.1	-3.38917	1	no
XM_021567869.1	-2.20736	1	no
NM_001124751.1	-2.24681	1	no
XM_021593465.1	1.50218	1	no
XM_021591023.1	-1.69534	1	no
XM_021583233.1	1.33619	1	no
XM_021565705.1	-2.37417	1	no
XM_021624660.1	1.24105	1	no
XM_021560920.1	-3.39711	1	no
XM_021618105.1	-2.09454	1	no
XM_021561769.1	-2.75554	1	no
XM_021585140.1	1.99205	1	no
XM_021565347.1	2.63273	1	no
XM_021566426.1	-2.11261	1	no
XR_002469504.1	2.24994	1	no
XM_021574633.1	-2.25911	1	no
XM_021617356.1	-2.42641	1	no
XM_021579622.1	-4.46328	1	no
XM_021582790.1	-2.04676	1	no
XM_021618006.1	1.27744	1	no
XM_021617202.1	-2.17203	1	no
XM_021607552.1	-1.84671	1	no
XM_021556976.1	1.52688	1	no
XM_021598395.1	-1.97228	1	no
XM_021562346.1	1.8693	1	no
XM_021598796.1	1.27773	1	no
XM_021622528.1	-2.72928	1	no
XM_021582443.1	-2.38496	1	no
XM_021556734.1	-1.95613	1	no
XM_021614803.1	-3.08099	1	no
XM_021563484.1	-1.66725	1	no
XM_021599014.1	-2.77336	1	no
XM_021568901.1	1.21019	1	no
XM_021582824.1	2.90009	1	no
XM_021610623.1	-2.09476	1	no
XM_021575406.1	-1.69814	1	no
XM_021579056.1	-1.90151	1	no
XM_021623148.1	1.24707	1	no
NM_001124247.1	-1.95091	1	no
XM_021591378.1	1.47677	1	no
NM_001124525.1	1.24117	1	no
XM_021606466.1	-2.00448	1	no
XM_021617642.1	-2.69584	1	no
XM_021597440.1	1.2916	1	no
XM_021591341.1	-3.8045	1	no
XM_021622495.1	-3.66361	1	no
XM_021576861.1	1.34002	1	no
XM_021612399.1	-1.91483	1	no
XM_021570394.1	1.43884	1	no
NM_001193456.1	-2.12209	1	no
XM_021569590.1	1.69313	1	no
XM_021589039.1	3.67345	1	no
XM_021584022.1	1.94775	1	no
XM_021590466.1	1.2659	1	no
XR_002473150.1	1.77922	1	no
XM_021572866.1	-2.044	1	no
XM_021571336.1	-1.72713	1	no
XM_021621664.1	2.44951	1	no
XM_021623044.1	3.63771	1	no
XM_021612807.1	-2.37771	1	no
XM_021601808.1	1.29082	1	no
XM_021578055.1	-2.10066	1	no
XM_021621980.1	-1.83515	1	no
XM_021591382.1	-2.5934	1	no
XM_021609821.1	-1.65193	1	no
XM_021563208.1	-1.76072	1	no
XM_021609896.1	-2.36104	1	no
XR_002468371.1	-3.25959	1	no
XM_021560480.1	-1.81685	1	no
XM_021576679.1	-2.04374	1	no
XM_021616538.1	1.4199	1	no
XM_021591690.1	1.49641	1	no
XM_021596905.1	-2.32699	1	no
XM_021624597.1	-1.76305	1	no
XM_021608694.1	-3.74065	1	no
XM_021610721.1	-1.67309	1	no
XM_021557352.1	-1.7244	1	no
XM_021579333.1	-1.86815	1	no
XM_021589629.1	2.36077	1	no
XM_021561496.1	-4.28006	1	no
NM_001124188.1	1.89932	1	no
XM_021577428.1	2.44114	1	no
XM_021565779.1	2.2768	1	no
XM_021614978.1	-1.97181	1	no
XM_021578596.1	1.25724	1	no
XM_021564894.1	2.52334	1	no
XM_021567437.1	-1.91998	1	no
XM_021564010.1	2.43152	1	no
XM_021568229.1	2.48721	1	no
XM_021570387.1	-7.19678	1	no
XM_021600666.1	1.4127	1	no
NM_001160696.1	1.46935	1	no
XM_021582161.1	2.0342	1	no
XM_021611662.1	-2.12212	1	no
XM_021608395.1	-1.95143	1	no
XM_021606957.1	-3.66449	1	no
XM_021623045.1	-1.52143	1	no
XM_021560173.1	1.71542	1	no
XM_021596654.1	-1.79142	1	no
XM_021615800.1	2.54161	1	no
XM_021621510.1	-3.58876	1	no
XM_021563870.1	-3.78027	1	no
XR_002474427.1	-3.15202	1	no
XM_021569279.1	2.18827	1	no
XM_021613625.1	2.346	1	no
XM_021576961.1	1.74059	1	no
XM_021620087.1	2.16067	1	no
XM_021581034.1	1.68483	1	no
XM_021611052.1	-1.61918	1	no
XM_021610084.1	-2.07653	1	no
XM_021560608.1	-2.84734	1	no
XM_021577870.1	1.13922	1	no
XM_021589291.1	-1.47611	1	no
XM_021616578.1	3.22402	1	no
XM_021574918.1	-2.88141	1	no
XM_021624164.1	2.49925	1	no
XM_021596864.1	-1.99514	1	no
XM_021567136.1	1.50848	1	no
XM_021611309.1	-1.60064	1	no
XM_021625402.1	2.07375	1	no
XM_021597450.1	2.56748	1	no
XM_021584204.1	-1.81414	1	no
XM_021612995.1	1.31662	1	no
XM_021557774.1	-1.84652	1	no
XM_021575423.1	1.46778	1	no
XM_021565474.1	-3.7116	1	no
XM_021595976.1	-1.61073	1	no
XM_021578907.1	-2.81304	1	no
XM_021562115.1	-1.93865	1	no
XM_021597774.1	-3.18224	1	no
XM_021620939.1	-3.63011	1	no
XM_021612531.1	1.33228	1	no
XM_021618535.1	-1.75266	1	no
XM_021569692.1	-3.1308	1	no
XM_021569457.1	1.30044	1	no
XM_021596582.1	1.26979	1	no
XM_021623697.1	-2.83112	1	no
XM_021616033.1	-1.50272	1	no
XM_021565212.1	-1.36171	1	no
XM_021606532.1	3.16203	1	no
XM_021591352.1	-1.9513	1	no
XM_021579549.1	3.06405	1	no
NM_001124538.1	1.21217	1	no
XM_021590188.1	-2.30372	1	no
XM_021560560.1	1.37941	1	no
XM_021605488.1	2.51477	1	no
XM_021586255.1	-2.64936	1	no
XM_021615759.1	-1.43933	1	no
XM_021567257.1	-1.80496	1	no
XM_021582143.1	-3.36126	1	no
XM_021620345.1	-3.22039	1	no
XM_021575322.1	1.20384	1	no
XM_021590823.1	3.01361	1	no
XM_021580639.1	2.26825	1	no
XM_021605378.1	-1.6072	1	no
XM_021595815.1	-1.36193	1	no
XM_021603330.1	1.2583	1	no
XM_021586045.1	-3.42584	1	no
XM_021605548.1	-1.80504	1	no
XM_021579052.1	-1.77273	1	no
XM_021625089.1	-3.22261	1	no
XM_021560396.1	-1.37015	1	no
XM_021579454.1	2.04132	1	no
XM_021593285.1	3.94665	1	no
XM_021602672.1	-1.65695	1	no
XM_021582753.1	-2.90285	1	no
XM_021611347.1	-1.89224	1	no
NM_001124509.1	1.30955	1	no
XM_021589332.1	1.82481	1	no
XM_021583810.1	-3.61707	1	no
XM_021625919.1	1.15292	1	no
XM_021614780.1	2.13116	1	no
XM_021560366.1	1.20761	1	no
XM_021592333.1	1.60709	1	no
XM_021623238.1	-2.051	1	no
XM_021573627.1	-1.89021	1	no
XM_021597565.1	1.54342	1	no
XR_002472078.1	-3.68464	1	no
XM_021573108.1	-1.97636	1	no
XM_021592385.1	3.55577	1	no
XM_021601661.1	1.56186	1	no
XM_021591999.1	1.4322	1	no
XM_021564638.1	1.53015	1	no
XM_021607228.1	-1.6678	1	no
XM_021566937.1	-2.10652	1	no
XM_021596961.1	3.04748	1	no
XM_021612585.1	-1.90937	1	no
XM_021598828.1	-3.20513	1	no
XR_002475870.1	-1.89816	1	no
XM_021579004.1	-1.92855	1	no
XM_021607428.1	2.40856	1	no
XM_021586134.1	1.1779	1	no
XM_021601519.1	1.56467	1	no
XM_021598571.1	-1.84989	1	no
XM_021620421.1	-2.13426	1	no
XM_021598629.1	-2.02902	1	no
XM_021615578.1	-1.41204	1	no
XM_021622615.1	-1.45743	1	no
XM_021560469.1	3.37175	1	no
XM_021565937.1	-1.59591	1	no
XM_021568180.1	4.1678	1	no
XM_021615662.1	1.83054	1	no
XM_021602113.1	1.17234	1	no
XM_021585843.1	1.79713	1	no
XM_021616469.1	-1.90975	1	no
XM_021592929.1	-3.62437	1	no
XM_021599742.1	-1.97025	1	no
XR_002474998.1	4.111	1	no
XM_021592683.1	2.23022	1	no
XM_021582137.1	1.52249	1	no
XM_021590779.1	-2.80012	1	no
XM_021577396.1	-3.65167	1	no
XM_021604060.1	-3.25125	1	no
XM_021576074.1	-2.44678	1	no
XM_021562438.1	-1.41896	1	no
XM_021600730.1	1.5191	1	no
XM_021559120.1	-1.77662	1	no
XM_021566822.1	1.18403	1	no
XM_021597999.1	-1.73633	1	no
XM_021568453.1	-1.68246	1	no
XM_021616260.1	-1.46685	1	no
XM_021616688.1	1.67803	1	no
XM_021614406.1	-2.023	1	no
XM_021625063.1	-2.4065	1	no
XM_021603636.1	4.16368	1	no
XM_021614882.1	-1.46793	1	no
XM_021622777.1	1.36935	1	no
XM_021604152.1	1.41501	1	no
XM_021613583.1	-1.95732	1	no
XM_021575764.1	1.58477	1	no
XM_021560981.1	-1.82271	1	no
XR_002472077.1	-3.54413	1	no
XM_021601709.1	-2.53755	1	no
XM_021617589.1	-2.15689	1	no
XM_021617321.1	1.08503	1	no
XM_021609625.1	1.76984	1	no
XM_021588283.1	-1.96622	1	no
XM_021572428.1	-1.78258	1	no
XM_021603016.1	-4.51679	1	no
XM_021607799.1	2.03577	1	no
XR_002470524.1	-1.83443	1	no
XM_021615967.1	-1.76681	1	no
XM_021614334.1	3.17945	1	no
XM_021596920.1	-2.05493	1	no
XM_021615282.1	-2.0121	1	no
XM_021582088.1	-2.60893	1	no
XM_021590955.1	-2.57173	1	no
XM_021564297.1	2.53974	1	no
XM_021575432.1	-1.53963	1	no
XM_021574654.1	2.94489	1	no
XM_021591581.1	1.53225	1	no
XM_021577092.1	3.14812	1	no
XM_021584752.1	-1.91931	1	no
XM_021594789.1	-2.03647	1	no
XR_002475635.1	-2.28382	1	no
XM_021607078.1	1.72091	1	no
XM_021580414.1	3.25375	1	no
XM_021581249.1	1.27025	1	no
XM_021575993.1	-2.44252	1	no
XM_021607678.1	-2.57687	1	no
XM_021620150.1	-1.97844	1	no
XM_021587933.1	-3.50506	1	no
XM_021598962.1	-2.86356	1	no
XM_021616711.1	2.13228	1	no
XM_021565690.1	2.76413	1	no
XM_021618828.1	3.05471	1	no
XM_021575068.1	-2.09069	1	no
XR_002474860.1	-2.45209	1	no
XM_021616151.1	2.9415	1	no
XM_021583621.1	1.40155	1	no
XM_021620585.1	2.17296	1	no
XM_021573390.1	-1.94009	1	no
XM_021607451.1	1.64545	1	no
XM_021588737.1	-2.56709	1	no
XR_002471880.1	-1.93493	1	no
XM_021591767.1	-1.42866	1	no
XM_021558081.1	2.26248	1	no
XM_021616754.1	2.2795	1	no
XM_021621694.1	-2.40429	1	no
XM_021589679.1	-2.46079	1	no
XM_021611772.1	1.36301	1	no
XM_021559953.1	2.48167	1	no
NM_001124290.1	-2.488	1	no
XM_021588724.1	1.0609	1	no
XM_021587344.1	1.6819	1	no
XM_021613585.1	1.57183	1	no
XM_021576551.1	1.517	1	no
XM_021576231.1	-2.74901	1	no
XM_021608094.1	-2.1836	1	no
NM_001160683.1	1.08988	1	no
XM_021563485.1	1.41755	1	no
XM_021569719.1	-1.3451	1	no
XM_021570524.1	-1.7678	1	no
XM_021597348.1	3.62694	1	no
NM_001165219.1	-1.63759	1	no
XM_021572336.1	-3.79967	1	no
XM_021611513.1	-2.49396	1	no
XM_021607159.1	-3.59532	1	no
XM_021562705.1	2.71212	1	no
XM_021618207.1	-1.65374	1	no
XM_021562474.1	1.94441	1	no
XM_021579226.1	1.18609	1	no
XR_002472041.1	-1.63764	1	no
XM_021596410.1	1.63359	1	no
XM_021609708.1	2.5602	1	no
XM_021596415.1	-1.80869	1	no
XM_021621219.1	-1.56431	1	no
XM_021566920.1	-1.54479	1	no
XM_021617064.1	1.06227	1	no
XM_021557421.1	-2.06724	1	no
XM_021562352.1	-2.52078	1	no
XM_021599905.1	-1.84068	1	no
XM_021578598.1	-3.21148	1	no
XM_021592868.1	-3.41604	1	no
XM_021610565.1	-3.54429	1	no
XM_021568707.1	1.19392	1	no
XM_021596610.1	-2.73798	1	no
XM_021624758.1	2.18326	1	no
XM_021619283.1	2.16503	1	no
XM_021564836.1	2.6601	1	no
XM_021571388.1	3.06372	1	no
XM_021625397.1	1.10776	1	no
XM_021598662.1	-1.85968	1	no
XM_021621290.1	1.75446	1	no
XM_021564664.1	-1.58376	1	no
XM_021590112.1	1.50874	1	no
XM_021600120.1	2.72052	1	no
XM_021566905.1	-2.68234	1	no
XM_021578207.1	1.95342	1	no
XM_021595539.1	-1.62979	1	no
XM_021578042.1	3.53873	1	no
XM_021566769.1	-3.40981	1	no
XM_021621513.1	-2.86906	1	no
XM_021561720.1	-2.15927	1	no
XM_021557045.1	-2.03365	1	no
XM_021561175.1	3.2552	1	no
XM_021588229.1	2.91059	1	no
XM_021601582.1	1.07034	1	no
XM_021572377.1	2.50569	1	no
XM_021575258.1	1.41288	1	no
XM_021587614.1	-1.49384	1	no
XM_021589185.1	1.83961	1	no
XM_021593405.1	1.03995	1	no
XM_021600020.1	-2.06602	1	no
XM_021560599.1	1.32849	1	no
XM_021572563.1	-1.83623	1	no
XM_021606524.1	1.69408	1	no
XM_021598984.1	1.23062	1	no
XM_021578894.1	-1.48562	1	no
XM_021618481.1	-1.91481	1	no
XM_021599024.1	4.01996	1	no
XM_021613354.1	1.35747	1	no
XR_002472665.1	1.26152	1	no
XM_021605848.1	3.1028	1	no
XM_021607315.1	2.89953	1	no
XM_021575072.1	1.53968	1	no
XM_021618043.1	-2.80604	1	no
XM_021605123.1	-1.88714	1	no
XM_021612937.1	-1.72156	1	no
XM_021625659.1	-2.87763	1	no
XM_021623279.1	-1.34213	1	no
XM_021574455.1	-3.7739	1	no
XM_021597197.1	-1.97481	1	no
XM_021625735.1	-1.5899	1	no
XM_021606040.1	-2.00864	1	no
XM_021557883.1	1.36434	1	no
XM_021585044.1	-2.78106	1	no
XM_021582238.1	-4.32625	1	no
XM_021565453.1	1.55025	1	no
XM_021598876.1	-2.61313	1	no
XM_021606432.1	-2.00827	1	no
XM_021569042.1	2.85347	1	no
XM_021587795.1	4.8438	1	no
XM_021613632.1	2.40016	1	no
XM_021583546.1	-1.45066	1	no
XM_021561535.1	1.12081	1	no
XM_021622776.1	1.74671	1	no
XM_021576931.1	-1.79156	1	no
XM_021625510.1	-1.88482	1	no
XM_021589218.1	1.16409	1	no
XM_021603500.1	2.48224	1	no
XM_021624561.1	-1.8412	1	no
XM_021589678.1	1.73536	1	no
XM_021604137.1	2.89163	1	no
XM_021588291.1	-2.73131	1	no
XM_021606665.1	1.92248	1	no
XM_021577611.1	-1.83721	1	no
XM_021601852.1	1.43149	1	no
XR_002471159.1	-2.42433	1	no
XM_021577141.1	1.24887	1	no
XM_021577386.1	-1.31109	1	no
XM_021606768.1	-1.57684	1	no
XM_021600888.1	1.59114	1	no
XM_021587740.1	1.33027	1	no
XM_021617976.1	-2.5788	1	no
XR_002468797.1	-1.41082	1	no
XM_021602170.1	2.33047	1	no
XM_021596780.1	-1.55176	1	no
XM_021592396.1	3.52463	1	no
XR_002468661.1	-3.82487	1	no
XM_021602109.1	-4.28701	1	no
XM_021625569.1	-1.66478	1	no
XM_021591597.1	1.21525	1	no
XM_021557326.1	3.3098	1	no
XM_021612205.1	1.08398	1	no
XM_021605777.1	-3.02167	1	no
XM_021616094.1	1.02153	1	no
XM_021602644.1	3.21873	1	no
XM_021579409.1	-2.23517	1	no
XM_021608756.1	-2.41457	1	no
XM_021573624.1	-1.77987	1	no
XM_021618288.1	-2.24885	1	no
NM_001165156.1	1.89365	1	no
XM_021610707.1	1.2391	1	no
XR_002473976.1	-1.73605	1	no
XM_021585540.1	1.51257	1	no
XM_021577387.1	1.19233	1	no
XM_021579912.1	1.37471	1	no
XM_021589732.1	-1.88007	1	no
XM_021569032.1	1.19153	1	no
XM_021616473.1	-2.22383	1	no
XM_021598104.1	-2.64215	1	no
XM_021595500.1	1.46423	1	no
XM_021574276.1	-1.91008	1	no
XM_021576937.1	3.49399	1	no
XM_021606230.1	1.32105	1	no
XR_002469965.1	-3.76071	1	no
XM_021615201.1	-1.72201	1	no
XM_021613546.1	-1.48971	1	no
XM_021622726.1	1.28143	1	no
XM_021600272.1	-1.47257	1	no
XM_021588720.1	-1.63066	1	no
XM_021611846.1	-2.49591	1	no
XM_021602401.1	1.23925	1	no
XM_021596097.1	1.38376	1	no
XM_021566932.1	1.46119	1	no
XM_021612793.1	-2.918	1	no
XM_021609800.1	1.37014	1	no
XM_021624998.1	1.63928	1	no
XM_021582869.1	2.81185	1	no
XM_021619498.1	1.19823	1	no
XM_021567121.1	1.0162	1	no
XM_021576143.1	-1.45357	1	no
XM_021613938.1	1.65181	1	no
XM_021560647.1	-3.14833	1	no
XM_021576526.1	-1.3398	1	no
XM_021556844.1	-1.99766	1	no
XM_021596457.1	1.597	1	no
XM_021575506.1	-2.15501	1	no
XM_021612487.1	2.20437	1	no
XM_021595761.1	1.87555	1	no
XM_021581180.1	-1.90369	1	no
XM_021600797.1	1.08799	1	no
XM_021620272.1	1.17327	1	no
XM_021580777.1	1.31433	1	no
XR_002473100.1	1.31421	1	no
XM_021624560.1	-2.32368	1	no
XM_021585024.1	-2.13796	1	no
XM_021616451.1	-1.8696	1	no
XM_021586989.1	1.03169	1	no
XM_021575895.1	1.91608	1	no
XM_021618766.1	-1.7542	1	no
XM_021571830.1	2.19626	1	no
XM_021584193.1	2.8064	1	no
XM_021616040.1	3.64578	1	no
XM_021561530.1	1.69627	1	no
XM_021559663.1	-1.82698	1	no
XM_021566821.1	1.11268	1	no
XM_021589328.1	-2.8611	1	no
XM_021618455.1	-1.54497	1	no
XM_021560171.1	2.33453	1	no
XM_021604760.1	1.23514	1	no
XM_021583257.1	-1.57863	1	no
XM_021569856.1	-1.26142	1	no
XM_021576344.1	-1.65281	1	no
XR_002475612.1	1.278	1	no
NM_001160550.1	-1.95681	1	no
XR_002473551.1	1.56017	1	no
XM_021606140.1	1.47317	1	no
XM_021588582.1	-1.87701	1	no
XM_021578725.1	1.05574	1	no
XM_021561708.1	1.4172	1	no
XM_021565131.1	1.41576	1	no
XM_021584110.1	-1.66217	1	no
XM_021615621.1	3.82479	1	no
XM_021598381.1	1.30609	1	no
XM_021609431.1	1.49617	1	no
XR_002470238.1	-2.99002	1	no
XM_021625513.1	-1.41401	1	no
XM_021563383.1	-2.13823	1	no
XM_021606237.1	-1.70773	1	no
XM_021588814.1	-1.33106	1	no
XM_021571463.1	-1.78817	1	no
XM_021612546.1	1.25616	1	no
XM_021591701.1	2.42197	1	no
XM_021588200.1	1.15823	1	no
XM_021569822.1	-2.51333	1	no
XM_021569187.1	-2.09148	1	no
XM_021617643.1	-2.44093	1	no
XR_002474568.1	-1.66439	1	no
XM_021584019.1	-1.61688	1	no
XM_021623463.1	2.69271	1	no
XM_021574533.1	-2.38904	1	no
XM_021566255.1	-2.13593	1	no
XM_021560865.1	-1.425	1	no
XM_021560649.1	1.30692	1	no
XM_021575455.1	1.50808	1	no
XM_021568295.1	-2.88304	1	no
XM_021562769.1	1.13332	1	no
XM_021583231.1	1.20874	1	no
XM_021609104.1	-1.65163	1	no
XM_021589765.1	2.72632	1	no
XM_021590619.1	1.75896	1	no
XM_021595434.1	-2.38148	1	no
XM_021602893.1	-1.37902	1	no
XM_021592992.1	-1.77642	1	no
XM_021584829.1	-1.65674	1	no
XM_021602192.1	2.53027	1	no
XM_021604264.1	2.77163	1	no
XM_021586941.1	2.90059	1	no
XM_021594650.1	-2.21887	1	no
XM_021576061.1	-2.88006	1	no
XM_021576481.1	1.96825	1	no
XM_021567445.1	1.57885	1	no
XM_021589711.1	-1.33981	1	no
XM_021578931.1	-1.53151	1	no
XM_021597040.1	-1.56386	1	no
XM_021591568.1	2.15821	1	no
XM_021566254.1	-2.96945	1	no
XM_021606438.1	-2.65371	1	no
XM_021578653.1	-2.19034	1	no
XM_021566560.1	-1.71567	1	no
XM_021613478.1	1.22059	1	no
XM_021576013.1	-1.33198	1	no
XM_021610705.1	2.04565	1	no
XM_021566987.1	-1.72462	1	no
XM_021613217.1	-2.63173	1	no
XM_021581494.1	-2.30102	1	no
XM_021601371.1	-2.25012	1	no
XM_021573752.1	-2.78845	1	no
XM_021611527.1	-1.81916	1	no
XM_021564766.1	3.38641	1	no
XM_021574713.1	-1.54826	1	no
XM_021584883.1	2.47836	1	no
XM_021576469.1	1.72079	1	no
XM_021583801.1	1.16076	1	no
XM_021606782.1	-1.59374	1	no
XM_021574913.1	-1.34459	1	no
XM_021586266.1	-1.42985	1	no
XM_021586371.1	-2.86492	1	no
XM_021603407.1	4.30249	1	no
XM_021586260.1	1.2869	1	no
NM_001160586.1	-1.81479	1	no
XM_021591545.1	1.69012	1	no
XR_002472552.1	2.92969	1	no
XM_021613817.1	2.11446	1	no
XM_021608054.1	1.43219	1	no
XR_002473345.1	-1.72489	1	no
XM_021577455.1	-2.05878	1	no
XM_021613590.1	-1.69907	1	no
XM_021567980.1	-2.2766	1	no
XM_021567683.1	1.42573	1	no
XM_021586759.1	-1.47024	1	no
XM_021598107.1	-1.74408	1	no
XM_021606136.1	2.48009	1	no
XM_021616330.1	-1.46236	1	no
XM_021603565.1	-1.73725	1	no
XM_021565393.1	2.45855	1	no
XM_021562082.1	-2.46492	1	no
XM_021563561.1	3.14102	1	no
XM_021616833.1	1.80051	1	no
XM_021602500.1	-1.79955	1	no
XM_021622589.1	1.05752	1	no
XM_021609997.1	1.57528	1	no
XM_021624080.1	-1.78471	1	no
XM_021614781.1	1.89265	1	no
XM_021618024.1	1.09641	1	no
XM_021610379.1	2.01368	1	no
XM_021597470.1	-1.37725	1	no
XM_021561529.1	1.04385	1	no
XM_021589330.1	1.52964	1	no
XM_021624528.1	-1.93065	1	no
XM_021570397.1	1.02921	1	no
XM_021615323.1	-1.57348	1	no
XM_021589487.1	1.08856	1	no
XR_002470991.1	1.17408	1	no
XM_021578191.1	2.61814	1	no
XM_021557666.1	-1.35555	1	no
XM_021598438.1	-1.75079	1	no
XM_021585240.1	1.46366	1	no
XM_021579171.1	1.05733	1	no
XM_021584194.1	1.47553	1	no
XM_021578862.1	1.49569	1	no
XM_021566186.1	-4.0899	1	no
XM_021591336.1	1.02653	1	no
XM_021563049.1	1.11003	1	no
XM_021607798.1	1.47188	1	no
XM_021582898.1	-1.21983	1	no
XM_021592755.1	-1.71578	1	no
XM_021611957.1	-1.75487	1	no
XM_021589095.1	1.12129	1	no
XM_021607422.1	-1.45957	1	no
XM_021559425.1	1.92186	1	no
XM_021583296.1	-1.23323	1	no
XM_021578798.1	-1.65449	1	no
XM_021565806.1	-1.75693	1	no
XM_021605566.1	1.40048	1	no
XM_021617919.1	2.262	1	no
NM_001124601.1	1.00377	1	no
XM_021616015.1	-2.49048	1	no
XM_021588762.1	1.39978	1	no
XM_021614570.1	-2.37114	1	no
XM_021578198.1	-1.62621	1	no
XM_021572046.1	1.20565	1	no
XM_021564831.1	-1.50859	1	no
XM_021586422.1	-1.5765	1	no
XR_002474095.1	1.03871	1	no
XM_021621691.1	-1.63161	1	no
XM_021588243.1	1.40284	1	no
XM_021599118.1	-1.42252	1	no
XR_002469795.1	1.33388	1	no
XM_021559227.1	-2.49714	1	no
XM_021588183.1	3.51501	1	no
NM_001160480.1	2.04535	1	no
XM_021573535.1	-1.58253	1	no
XM_021603175.1	-2.22251	1	no
XM_021610511.1	-1.29245	1	no
XM_021582551.1	2.01022	1	no
XM_021624432.1	-1.65301	1	no
XM_021565015.1	1.40644	1	no
XM_021606688.1	-3.00258	1	no
XM_021584972.1	-2.65252	1	no
XM_021623621.1	-1.94476	1	no
XM_021561212.1	-3.99413	1	no
XM_021623338.1	1.6358	1	no
XM_021583877.1	-1.70997	1	no
XM_021599877.1	1.17207	1	no
XM_021567129.1	2.27401	1	no
XM_021578333.1	2.33735	1	no
XM_021602350.1	1.34268	1	no
XM_021617472.1	-3.49682	1	no
XM_021584512.1	-1.77247	1	no
XM_021568615.1	-2.12322	1	no
XM_021617582.1	1.27209	1	no
XM_021573086.1	-1.83076	1	no
XM_021599743.1	-2.45581	1	no
XM_021612564.1	1.42178	1	no
XM_021571658.1	2.00455	1	no
XM_021617318.1	-1.73865	1	no
XM_021580448.1	-1.47588	1	no
XR_002475638.1	1.01651	1	no
XM_021583610.1	-1.35316	1	no
XM_021565431.1	-1.23588	1	no
XM_021606271.1	-1.67045	1	no
XM_021586624.1	1.31585	1	no
XM_021568377.1	-2.69351	1	no
XM_021572214.1	1.01216	1	no
XR_002471664.1	-1.62819	1	no
XM_021559423.1	1.3324	1	no
XM_021597942.1	-1.67657	1	no
XM_021590464.1	-2.59233	1	no
XM_021575464.1	1.14568	1	no
XM_021576664.1	-1.7254	1	no
XM_021558414.1	0.967717	1	no
XM_021607659.1	-1.75085	1	no
XM_021557550.1	1.01534	1	no
XM_021622122.1	1.92362	1	no
XM_021622110.1	-2.08759	1	no
XM_021577242.1	2.51919	1	no
XR_002471002.1	-4.14956	1	no
XM_021576448.1	-3.5831	1	no
XM_021624452.1	-1.46946	1	no
XM_021602062.1	1.63398	1	no
XM_021583294.1	2.63416	1	no
XM_021606990.1	1.52124	1	no
XM_021587772.1	-1.73885	1	no
XM_021606055.1	2.45	1	no
XM_021582508.1	-2.89859	1	no
XM_021617636.1	-1.92831	1	no
XM_021604280.1	-2.41709	1	no
XM_021585918.1	-1.49457	1	no
XM_021578914.1	2.07087	1	no
XM_021561577.1	1.04325	1	no
XM_021560307.1	0.989231	1	no
XM_021603990.1	-1.59857	1	no
XM_021612924.1	-1.90506	1	no
XM_021602308.1	3.08661	1	no
XM_021621828.1	-1.56164	1	no
NM_001160644.1	-3.55206	1	no
XM_021618002.1	-3.97225	1	no
XM_021597574.1	-1.41825	1	no
XM_021606717.1	-1.35513	1	no
XM_021575254.1	1.70775	1	no
XM_021561613.1	-1.62276	1	no
XM_021588715.1	-1.36679	1	no
XM_021612107.1	-1.32337	1	no
XM_021613349.1	0.976335	1	no
XM_021581544.1	-1.56713	1	no
NM_001124552.1	-1.53795	1	no
XM_021597582.1	-2.17765	1	no
XM_021611507.1	-1.69577	1	no
XM_021625608.1	-3.61804	1	no
XM_021600441.1	3.06275	1	no
XM_021611216.1	1.98659	1	no
XM_021617586.1	1.3124	1	no
[truncated: 74,471 more rows]
