# Supplementary material for: Comprehensive analysis of miRNA-mRNA/lncRNA during gonadal development of triploid female rainbow trout (Oncorhynchus mykiss)
Source: Research Square preprint supplement (doi:10.21203/rs.3.rs-31357/v2), 2020-12-10
Supplement: Supplementary file 2 [file fad8cdbe5c9ce61137610fbe.docx]

Table S14 Primers for the analysis of RNAs expression by qRT-PCR

| Primer name | Primer sequences (5’-3’) |
| --- | --- |
| ssa-miR-730a-5p | TCCTCATTGTGCATGCTGTGTG |
| ola-miR-199a-3p_L+1R+1 | GGGAACAGTAGTCTGCACATTGGTT |
| PC-5p-21854_317 | CGGTGGATACAATTGAGTTTTGGAT |
| dre-miR-26a-5p_R+2_1ss17TG | GGTTCAAGTAATCCAGGAGAGGCTT |
| oni-miR-1388_1ss1AT | CTGGACTGTCCAACCTGAGAATG |
| PC-5p-28329_238 | GGCCCTGTTGTACTTCTCCTGC |
| gmo-miR-10544-3p_R+1_1ss18CT | CGCACGGGGCCACGCTCT |
| dre-miR-15a-5p_R+1 | TAGCAGCACAGAATGGTTTGTGA |
| MSTRG.16520.3 sense | GTTAACTGTTATCCTTGCTATTCGG |
| MSTRG.16520.3 antisense | GTCGCACGGTTAGTGCATTAC |
| MSTRG.36177.2 sense | ACGAATACACTGCTTCAGACCG |
| MSTRG.36177.2 antisense | ATCAACCTGGACTGAGTTCATCAC |
| MSTRG.27463.3 sense | CTCAATGCTCCACAAGGAAGC |
| MSTRG.27463.3 antisense | CACGATGATGAGATGCGATATTC |
| MSTRG.74746.1 sense | TGAGGGAAACTTCGGAGGGA |
| MSTRG.74746.1 antisense | GAAACTCTGGTGGAGGTCCG |
| MSTRG.68716.1 sense | CCAGGGTCCTTAGCTTAGCG |
| MSTRG.68716.1 antisense | CATTGCACTCAACACTGCCC |
| MSTRG.30445.1 sense | GACTGGACCTCTGCTCTCCT |
| MSTRG.30445.1 antisense | CCACCATGACCCTTGACCTC |
| MSTRG.45214.1 sense | ATGAGACAGTGGATTGCGCA |
| MSTRG.45214.1 antisense | CGCTTTCCAGCTGGTGTCTA |
| MSTRG.27654.1 sense | TTCGAGTCCAGAAGCATCTCTG |
| MSTRG.27654.1 antisense | TTGTTGTCAGGTCCGTTGTCTG |
| MSTRG.14116.1 sense | CGGACTGTCTGGGATTGGTC |
| MSTRG.14116.1 antisense | AGTTTCGGCTCTCCATGGTG |
| MSTRG.36044.1 sense | TGACTGATGGACACTGACTTGC |
| MSTRG.36044.1 antisense | ACGGCATTCATAACCACATAG |
| MSTRG.74687.3 sense | CAGGCCTCCATTCCAAATTA |
| MSTRG.74687.3 antisense  MSTRG.76205.1 sense  MSTRG.76205.1 antisense  MSTRG.30919.1 sense  MSTRG.30919.1 antisense  MSTRG.82739.1 sense  MSTRG.82739.1 antisense  MSTRG.9268.1 sense  MSTRG.9268.1 antisense  MSTRG.63320.1 sense  MSTRG.63320.1 antisense  MSTRG.11839.3 sense  MSTRG.11839.3 antisense  MSTRG.37908.1 sense  MSTRG.37908.1 antisense  MSTRG.89468.1 sense  MSTRG.89468.1 antisense  MSTRG.19605.1 sense  MSTRG.19605.1 antisense  MSTRG.25614.1 sense | ACGTGAGTTGAACACGCAAC  TCAGAAGGTTGCGTGTTCAG  TCAAAAGCAGCATTGGTTTG  GGTTTAGCTCGGCAGAACAG  TTCTAATGGGCCTGGAAGTG  ATCTAAATGCGCGACAAACC  ACGCTGTGACAACATGCACT  CTGTGAGCTTGTGTGGCCTA  CTAGAGCTGCCCCAGTCAAC  GTAGCGATCGGTTGAAGAGC  AACCAGGGATTTCACCATGA  GGCTGTCGAAACGTTGGTAT  GGCTGTCGAAACGTTGGTAT  TTGCCCTCCAAATACACCTC  GCGTTTGACAGTGATGATGG  TCCAGTGCCAAAATAAAGCAC  ACAGGATGAGGTGGATGAGTG  TTACGGAAGAACAGCCAGGT  TGTAGACCCGACTCCTCCAG  TGTGTGCCACGATATAATACATCTC |
| MSTRG.25614.1 antisense | CCAGAATATACCCATAGTTCAGTGG |
| MSTRG.12054.1 sense  MSTRG.12054.1 antisense  ccne1 sense  ccne1 antisense | TGCAAAGCATCAACTCAACTG  GGTCGCTCTGTGCTTTTGTAG  AACGGCAACGTCTGATTTTC  CGTGGGATATAATGCCAAGC |
| YTHDF1 sense | GGCCATCAGCACAATAACTGC |
| YTHDF1 antisense | CCAAGGCTCAATTCTGCCAG |
| HAPLN4 sense | CCTGCACAGAGTAAGCAGTTCC |
| HAPLN4 antisense | GGTGCAATACTTGACTCATAGCC |
| DCN1 sense | TTGGACATAACGGTCACTCCAC |
| DCN 1antisense | GGTGTAGCAGGTTGGTAGTACCTG |
| BTAF1 sense | CACACCATATCATCAGTTAGACGG |
| BTAF1 antisense | GTCTTGCAGGACCTGGTTGAG |
| B3GAT1 sense | AACCATGCAGAGGAACCTGG |
| B3GAT1 antisense | GTAGACGATACCAGGCTGGC |
| EHBP1 sense | AACACCTCCTGGCGTAATGG |
| EHBP1 antisense | TATCGTTGGGTTCCAGTGCC |
| GGT5 sense | AGGACTCAAGCTGTGGAACG |
| GGT5 antisense | CTCCTCGTCAAACAGCCACT |
| STUM sense | TCCTGAACATTCCACTTCCTCC |
| STUM antisense | TGTCCAGTTCCTGTTGTCCAAG |
| IL12B sense | ATCAGCCGGTTACCTACTCTC |
| IL12B antisense | CACCTGGCTCGCTCTTATTCAG |
| Elovl5 sense | AGAGACTGCAAGATGTCGTTGG |
| Elovl5 antisense | AGGCGGCATATCCGACGTACG |
| 18S rRNA sense | CGGAGGTTCGAAGACGATCA |
| 18S rRNA antisense | TCGCTAGTTGGCATCGTTTAT |
| GAPDH sense | CATTGAGGGTCTGATGAGCA |
| GAPDH antisense | CCTCCACAGCTTTCCAGAAG |
